# Supplementary material
Source: bioRxiv or medRxiv preprint supplement (https://medrxiv.org/highwire/filestream/93390/field_highwire_adjunct_files/0/2020.06.01.20119750-1.pdf)

## Supplementary Information

### **SARS-CoV-2 genomic and subgenomic RNAs in diagnostic samples are not an indicator of active replication**

Soren Alexandersen<sup>1,2,3,\*</sup>, Anthony Chamings<sup>1,2</sup>, and Tarka Raj Bhatta<sup>1,2</sup>

<sup>1</sup>Geelong Centre for Emerging Infectious Diseases, Geelong, VIC 3220, Australia; <sup>2</sup>Deakin University, Geelong, VIC 3220, Australia; <sup>3</sup>Barwon Health, University Hospital Geelong, Geelong, VIC 3220 Australia

\* Correspondence: soren.alexandersen@deakin.edu.au; Tel.: +61-0-342159635

Supplementary Information S1. Fasta file (Wuhan-Hu-1-NC\_045512-21500-and-subgenomics-SA4.fasta) with the sequences used to map genome and subgenomic RNAs.

>First\_21500\_nt

```
ATTAAAGGTTTATACCTTCCCAGGTAACAAACCAACCAACTTTCGATCTCTTGTA
GATCTGTTCTCTAAACGAACTTTAAAATCTGTGTGGCTGTCACTCGGCTGCATGC
TTAGTGCACCTCACGCAGTATAATTAATAACTAATTACTGTCGTTGACAGGACACG
AGTAACTCGTCTATCTTCTGCAGGCTGCTTACGGTTTCGTCCGTGTTGCAGCCGAT
CATCAGCACATCTAGGTTTCGTCCGGGTGTGACCGAAAGGTAAGATGGAGAGCC
TTGTCCCTGGTTTCAACGAGAAAACACACGTCCAACCTCAGTTTGCCTGTTTTACA
GGTTCGCGACGTGCTCGTACGTGGCTTTGGAGACTCCGTGGAGGAGGTCTTATCA
GAGGCACGTCAACATCTTAAAGATGGCACTTGTGGCTTAGTAGAAGTTGAAAAA
GGCGTTTTGCCTCAACTTGAACAGCCCTATGTGTTTCATCAAACGTTCCGGATGCTC
GAACTGCACCTCATGGTCATGTTATGGTTGAGCTGGTAGCAGAACTCGAAGGCAT
TCAGTACGGTCGTAGTGGTGAGACACTTGGTGTCCTTGTCCCTCATGTGGGCGAA
ATACCAGTGGCTTACCGCAAGGTTCTTCTTCGTAAGAACGGTAATAAAGGAGCTG
GTGGCCATAGTTACGGCGCCGATCTAAAGTCATTTGACTTAGGCGACGAGCTTGG
CACTGATCCTTATGAAGATTTTCAAGAAAACCTGGAACACTAAACATAGCAGTGG
```

TGTTACCCGTGAACTCATGCGTGAGCTTAACGGAGGGGCATACACTCGCTATGTC  
GATAACAACCTTCTGTGGCCCTGATGGCTACCCTCTTGAGTGCATTAAAGACCTTC  
TAGCACGTGCTGGTAAAGCTTCATGCACTTTGTCCGAACAACCTGGACTTTATTGA  
CACTAAGAGGGGTGTATACTGCTGCCGTGAACATGAGCATGAAATTGCTTGGTA  
CACGGAACGTTCTGAAAAGAGCTATGAATTGCAGACACCTTTTGAAATTAATTG  
GCAAAGAAATTTGACACCTTCAATGGGGAATGTCCAAATTTTGTATTTCCCTTAA  
ATTCCATAATCAAGACTATTCAACCAAGGGTTGAAAAGAAAAAGCTTGATGGCT  
TTATGGGTAGAATTCGATCTGTCTATCCAGTTGCGTCACCAAATGAATGCAACCA  
AATGTGCCTTCAACTCTCATGAAGTGTGATCATTGTGGTGAACTTCATGGCAG  
ACGGGCGATTTTGTAAAGCCACTTGCGAATTTTGTGGCACTGAGAATTTGACTA  
AAGAAGGTGCCACTACTTGTGGTACTTACCCCAAATGCTGTTGTTAAAATTTA  
TTGTCCAGCATGTCACAATTCAGAAGTAGGACCTGAGCATAGTCTTGCCGAATAC  
CATAATGAATCTGGCTTGAAAACCATTCTTCGTAAGGGTGGTCGCACTATTGCCT  
TTGGAGGCTGTGTGTTCTCTTATGTTGGTTGCCATAACAAGTGTGCCTATTGGGTT  
CCACGTGCTAGCGCTAACATAGGTTGTAACCATACAGGTGTTGTTGGAGAAGGT  
CCGAAGGTCTTAATGACAACCTTCTTGAAATACTCCAAAAAGAGAAAGTCAACA  
TCAATATTGTTGGTGACTTTAACTTAATGAAGAGATCGCCATTATTTTGGCATCT  
TTTTCTGCTTCCACAAGTGCTTTTGTGGAACTGTGAAAGGTTTGGATTATAAAG  
CATTCAAACAAATTGTTGAATCCTGTGGTAATTTTAAAGTTACAAAAGGAAAAGC  
TAAAAAGGTGCCTGGAATATTGGTGAACAGAAATCAATACTGAGTCCTCTTTAT  
GCATTTGCATCAGAGGCTGCTCGTGTGTACGATCAATTTTCTCCCGCACTCTTGA  
AACTGCTCAAATTTCTGTGCGTGTTTTACAGAAGGCCGCTATAACAATACTAGAT  
GGAATTTACAGTATTCACTGAGACTCATTGATGCTATGATGTTACATCTGATTT  
GGCTACTAACAATCTAGTTGTAATGGCCTACATTACAGGTGGTGTGTTGTTGAGTTG  
ACTTCGCAGTGGCTAACTAACATCTTTGGCACTGTTTATGAAAACTCAAACCCG  
TCCTTGATTGGCTTGAAGAGAAGTTTAAAGGAAGGTGTAGAGTTTCTTAGAGACGG  
TTGGGAAATTGTTAAATTTATCTCAACCTGTGCTTGTGAAATTGTTCGGTGGACAA  
ATTGTCACCTGTGCAAAGGAAATTAAGGAGAGTGTTCAGACATTCTTTAAGCTTG  
TAAATAAATTTTGGCTTTGTGTGCTGACTCTATCATTATTGGTGGAGCTAACTT  
AAAGCCTTGAATTTAGGTGAAACATTTGTCACGCACTCAAAGGGATTGTACAGA  
AAGTGTGTTAAATCCAGAGAAGAACTGGCCTACTCATGCCTCTAAAAGCCCCA  
AAAGAAATTATCTTCTTAGAGGGAGAAACACTTCCCACAGAAGTGTTAACAGAG  
GAAGTTGTCTTGAAAACCTGGTGATTTACAACCATTAGAACAACCTACTAGTGAAG  
CTGTTGAAGCTCCATTGGTTGGTACACCAGTTTGTATTAACGGGCTTATGTTGCTC

GAAATCAAAGACACAGAAAAGTACTGTGCCCTTGCACCTAATATGATGGTAACA  
ACAATACCTTCACACTCAAAGGCGGTGCACCAACAAAGGTTACTTTTGGTGATG  
ACACTGTGATAGAAGTGCAAGGTTACAAGAGTGTGAATATCACTTTTGAACCTGA  
TGAAAGGATTGATAAAGTACTTAATGAGAAGTGCTCTGCCTATACAGTTGAACTC  
GGTACAGAAGTAAATGAGTTCGCCTGTGTTGTGGCAGATGCTGTCATAAAAACCT  
TGCAACCAGTATCTGAATTACTTACACCACTGGGCATTGATTTAGATGAGTGGAG  
TATGGCTACATACTACTTATTTGATGAGTCTGGTGAGTTTAAATTGGCTTCACATA  
TGTATTGTTCTTTCTACCCTCCAGATGAGGATGAAGAAGAAGGTGATTGTGAAGA  
AGAAGAGTTTGAGCCATCAACTCAATATGAGTATGGTACTGAAGATGATTACCA  
AGGTAAACCTTTGGAATTTGGTGCCACTTCTGCTGCTCTTCAACCTGAAGAAGAG  
CAAGAAGAAGATTGGTTAGATGATGATAGTCAACAACTGTTGGTCAACAAGAC  
GGCAGTGAGGACAATCAGACAACACTACTATTCAAACAATTGTTGAGGTTCAACCT  
CAATTAGAGATGGAACCTACACCAGTTGTTTCAGACTATTGAAGTGAATAGTTTAA  
GTGGTTATTTAAAACCTACTGACAATGTATACATTA AAAAATGCAGACATTGTGGA  
AGAAGCTAAAAAGGTAAAACCAACAGTGGTTGTTAATGCAGCCAATGTTTACCT  
TAAACATGGAGGAGGTGTTGCAGGAGCCTTAAATAAGGCTACTAACAAATGCCAT  
GCAAGTTGAATCTGATGATTACATAGCTACTAATGGACCACTTAAAGTGGGTGGT  
AGTTGTGTTTTAAGCGGACACAATCTTGCTAAACACTGTCTTCATGTTGTCGGCC  
CAAATGTTAACAAAGGTGAAGACATTCAACTTCTTAAGAGTGCTTATGAAAATTT  
TAATCAGCACGAAGTTCTACTTGCACCATTATTATCAGCTGGTATTTTTGGTGCTG  
ACCCTATACATTCTTTAAGAGTTTGTGTAGATACTGTTTCGCACAAATGTCTACTTA  
GCTGTCTTTGATAAAAATCTCTATGACAACTTGTTTCAAGCTTTTTGGAAATGA  
AGAGTGAAAAGCAAGTTGAACAAAAGATCGCTGAGATTCTTAAAGAGGAAGTTA  
AGCCATTTATAACTGAAAGTAAACCTTCAGTTGAACAGAGAAAACAAGATGATA  
AGAAAATCAAAGCTTGTGTTGAAGAAGTTACAACAACCTCTGGAAGAACTAAGT  
TCCTCACAGAAAACCTTGTTACTTTATATTGACATTAATGGCAATCTTCATCCAGAT  
TCTGCCACTCTTGTTAGTGACATTGACATCACTTTCTTAAAGAAAGATGCTCCAT  
ATATAGTGGGTGATGTTGTTCAAGAGGGTGTTTTAACTGCTGTGGTTATACCTAC  
TAAAAGGCTGGTGGCACTACTGAAATGCTAGCGAAAGCTTTGAGAAAAGTGCC  
AACAGACAATTATATAACCACTTACCCGGGTCAGGGTTTAAATGGTTACACTGTA  
GAGGAGGCAAAGACAGTGCTTAAAAAGTGTA AAAAGTGCCTTTTACATTCTACCA  
TCTATTATCTCTAATGAGAAGCAAGAAATTCTTGGAACCTGTTTCTTGGAATTTGC  
GAGAAATGCTTGCACATGCAGAAGAAACACGCAAATTAATGCCTGTCTGTGTGG  
AAACTAAAGCCATAGTTTCAACTATACAGCGTAAATATAAGGGTATTA AAAATAC

AAGAGGGTGTGGTTGATTATGGTGCTAGATTTTACTTTTACACCAGTAAAACAAC  
TGTAGCGTCACTTATCAACACACTTAACGATCTAAATGAAACTCTTGTTACAATG  
CCACTTGGCTATGTAACACATGGCTTAAATTTGGAAGAAGCTGCTCGGTATATGA  
GATCTCTCAAAGTGCCAGCTACAGTTTCTGTTTCTTCACCTGATGCTGTTACAGCG  
TATAATGGTTATCTTACTTCTTCTTCTAAAACACCTGAAGAACATTTTATTGAAAC  
CATCTCACTTGCTGGTTCCTATAAAGATTGGTCCTATTCTGGACAATCTACACAA  
CTAGGTATAGAATTTCTTAAGAGAGGTGATAAAAGTGTATATTACACTAGTAATC  
CTACCACATTCACCTAGATGGTGAAGTTATCACCTTTGACAATCTTAAGACACT  
TCTTTCTTTGAGAGAAGTGAGGACTATTAAGGTGTTTACAACAGTAGACAACATT  
AACCTCCACACGCAAGTTGTGGACATGTCAATGACATATGGACAACAGTTTGGTC  
CAACTATTTGGATGGAGCTGATGTTACTAAAATAAAACCTCATAATTCACATGA  
AGGTA AACATTTTATGTTTTACCTAATGATGACACTCTACGTGTTGAGGCTTTTG  
AGTACTACCACACA ACTGATCCTAGTTTTCTGGGTAGGTACATGTCAGCATTAAA  
TCACACTAAAAGTGGAAATACCCACAAGTTAATGGTTTAACTTCTATTAAATGG  
GCAGATAACA ACTGTTATCTTGCCACTGCATTGTTAACACTCCAACAAATAGAGT  
TGAAGTTTAAATCCACCTGCTCTACAAGATGCTTATTACAGAGCAAGGGCTGGTGA  
AGCTGCTAACTTTTGTGCACTTATCTTAGCCTACTGTAATAAGACAGTAGGTGAG  
TTAGGTGATGTTAGAGAAACAATGAGT TACTTGT TTTCAACATGCCAATTTAGATT  
CTTGCAAAGAGTCTTGAACGTGGTGTGTA AA ACTTGTGGACAACAGCAGACAA  
CCCTTAAGGGTGTAGAAAGCTGTTATGTACATGGGCACACTTTCTTATGAACAATT  
TAAGAAAGGTGTT CAGATACCTTGTACGTGTGGTAAACAAGCTACAAAATATCT  
AGTACAACAGGAGTCACCTTTTGT TATGATGTCAGCACCACCTGCTCAGTATGAA  
CTTAAGCATGGTACATTTACTTGTGCTAGTGAGTACACTGGTAATTACCAGTGTG  
GTCACTATAAACATATAACTTCTAAAGAACTTTGTATTGCATAGACGGTGCTTT  
ACTTACAAAGTCCTCAGAATACAAAGGTCCTATTACGGATGTTTTCTACAAAGAA  
AACAGTTACACAACAACCATAAAACCAGT TACTTATAAATTGGATGGTGTGTTT  
GTACAGAAATTGACCCTAAGTTGGACAATTATTATAAGAAAGACAATTCTTATTT  
CACAGAGCAACCAATTGATCTTGTACCAAACCAACCATATCCAAACGCAAGCTT  
CGATAATTTAAGTTTGTATGTGATAATATCAAATTTGCTGATGATTTAAACCAG  
TTAACTGGTTATAAGAAACCTGCTTCAAGAGAGCTTAAAGTTACATTTTCCCTG  
ACTTAAATGGTGATGTGGTGGCTATTGATTATAAACACTACACACCCTCTTTTAA  
GAAAGGAGCTAAATTGTTACATAAACCTATTGTTTGGCATGTTAACAATGCAACT  
AATAAAGCCACGTATAAACCAAATACCTGGTGTATACGTTGTCTTTGGAGCACAA  
AACAGTTGAAACATCAAATTCGTTTGTATGACTGAAGTCAGAGGACGCGCAGG

GAATGGATAATCTTGCCTGCGAAGATCTAAAACCAGTCTCTGAAGAAGTAGTGG  
AAAATCCTACCATACAGAAAGACGTTCTTGAGTGTAATGTGAAAACCTACCGAAG  
TTGTAGGAGACATTATACTTAAACCAGCAAATAATAGTTTAAAAATTACAGAAG  
AGGTTGGCCACACAGATCTAATGGCTGCTTATGTAGACAATTCTAGTCTTACTAT  
TAAGAAACCTAATGAATTATCTAGAGTATTAGGTTTGAAAACCCTTGCTACTCAT  
GGTTTAGCTGCTGTTAATAGTGTCCCTTGGGATACTATAGCTAATTATGCTAAGC  
CTTTTCTTAACAAAGTTGTTAGTACAACCTACTAACATAGTTACACGGTGTTTAAA  
CCGTGTTTGTACTAATTATATGCCTTATTTCTTTACTTTATTGCTACAATTGTGTAC  
TTTTACTAGAAGTACAAATTCTAGAATTAAGCATCTATGCCGACTACTATAGCA  
AAGAATACTGTTAAGAGTGTCCGGTAAATTTTGTCTAGAGGCTTCATTTAATTATT  
TGAAGTCACCTAATTTTCTAAACTGATAAATATTATAATTTGGTTTTTACTATTA  
AGTGTTTGCCTAGGTTCTTTAATCTACTCAACCGCTGCTTTAGGTGTTTTAATGTC  
TAATTTAGGCATGCCTTCTTACTGTACTGGTTACAGAGAAGGCTATTTGAACTCT  
ACTAATGTCACTATTGCAACCTACTGTACTGGTTCTATACCTTGTAGTGTTTGTCT  
TAGTGGTTTAGATTCTTTAGACACCTATCCTTCTTTAGAACTATACAAATTACCA  
TTTCATCTTTTAAATGGGATTTAACTGCTTTTGGCTTAGTTGCAGAGTGGTTTTTG  
GCATATATTCTTTTCACTAGGTTTTTCTATGTACTTGGATTGGCTGCAATCATGCA  
ATTGTTTTTCAGCTATTTTGCAGTACATTTTATTAGTAATTCTTGGCTTATGTGGTT  
AATAATTAATCTTGTACAAATGGCCCCGATTTTCAGCTATGGTTAGAATGTACATC  
TTCTTTGCATCATTTTATTATGTATGGAAAAGTTATGTGCATGTTGTAGACGGTTG  
TAATTCATCAACTTGTATGATGTGTTACAAACGTAATAGAGCAACAAGAGTCGA  
ATGTACAACCTATTGTTAATGGTGTTAGAAGGTCCTTTTATGTCTATGCTAATGGA  
GGTAAAGGCTTTTGCAACTACACAATTGGAATTGTGTTAATTGTGATACATTCT  
GTGCTGGTAGTACATTTATTAGTGATGAAGTTGCGAGAGACTTGTCACTACAGTT  
TAAAAGACCAATAAATCCTACTGACCAGTCTTCTTACATCGTTGATAGTGTTACA  
GTGAAGAATGGTTCCATCCATCTTTACTTTGATAAAGCTGGTCAAAGACTTATG  
AAAGACATTCTCTCTCTCATTTTGTAACTTAGACAACCTGAGAGCTAATAACAC  
TAAAGGTTCAATGCCTATTAATGTTATAGTTTTTGGATGGTAAATCAAATGTGAA  
GAATCATCTGCAAATCAGCGTCTGTTTACTACAGTCAGCTTATGTGTCAACCTA  
TACTGTTACTAGATCAGGCATTAGTGTCTGATGTTGGTGATAGTGCGGAAGTTGC  
AGTTAAAATGTTTGTGCTTACGTTAATACGTTTTTCATCAACTTTTAAACGTACCAA  
TGGA AAAACTCAAACACTAGTTGCAACTGCAGAAGCTGAACTTGCAAAGAATG  
TGTCCTTAGACAATGTCTTATCTACTTTTATTTTCAGCAGCTCGGCAAGGGTTTTGTT  
GATTCAGATGTAGAAACTAAAGATGTTGTTGAATGTCTTAAATTGTCACATCAAT

CTGACATAGAAGTTACTGGCGATAGTTGTAATAACTATATGCTCACCTATAACAA  
AGTTGAAAACATGACACCCCGTGACCTTGGTGCTTGTATTGACTGTAGTGCGCGT  
CATATTAATGCGCAGGTAGCAAAAAGTCACAACATTGCTTTGATATGGAACGTTA  
AAGATTTTCATGTCATTGTCTGAACAACACTACGAAAACAATACGTAGTGCTGCTAA  
AAAGAATAACTTACCTTTTAAGTTGACATGTGCAACTACTAGACAAGTTGTTAAT  
GTTGTAACAACAAAGATAGCACTTAAGGGTGGTAAAATTGTTAATAATTGGTTG  
AAGCAGTTAATTAAGTTACACTTGTGTTCCCTTTTTGTTGCTGCTATTTTCTATTT  
AATAACACCTGTTTCATGTCATGTCTAAACATACTGACTTTTCAAGTGAAATCATA  
GGATAACAAGGCTATTGATGGTGGTGTCACTCGTGACATAGCATCTACAGATACTT  
GTTTTGCTAACAAACATGCTGATTTTGACACATGGTTTAGCCAGCGTGGTGGTAG  
TTATACTAATGACAAAGCTTGCCCATGATTGCTGCAGTCATAACAAGAGAAGTG  
GGTTTTGTCGTGCCTGGTTTTGCCTGGCACGATATTACGCACAATAATGGTGACT  
TTTTGCATTTCTTACCTAGAGTTTTTAGTGCAGTTGGTAACATCTGTTACACACCA  
TCAAACCTTATAGAGTACACTGACTTTGCAACATCAGCTTGTGTTTTGGCTGCTG  
AATGTACAATTTTTAAAGATGCTTCTGGTAAGCCAGTACCATATTGTTATGATAC  
CAATGTACTAGAAGGTTCTGTTGCTTATGAAAGTTTACGCCCTGACACACGTTAT  
GTGCTCATGGATGGCTCTATTATTCAATTTCTAACACCTACCTTGAAGGTTCTGT  
TAGAGTGGTAACAACCTTTTGATTCTGAGTACTGTAGGCACGGCACTTGTGAAAGA  
TCAGAAGCTGGTGTGTTGTGTATCTACTAGTGGTAGATGGGTACTTAACAATGATT  
ATTACAGATCTTTACCAGGAGTTTTCTGTGGTGTAGATGCTGTAAATTTACTTACT  
AATATGTTTACACCACTAATTCAACCTATTGGTGCTTTGGACATATCAGCATCTAT  
AGTAGCTGGTGGTATTGTAGCTATCGTAGTAACATGCCTTGCCTACTATTTTATG  
AGGTTTAGAAGAGCTTTTTGGTGAATACAGTCATGTAGTTGCCTTTAATACTTTAC  
TATTCCTTATGTCATTCACTGTACTCTGTTTAAACACCAGTTTACTCATTCTTACCTG  
GTGTTTATTCTGTTATTTACTTGTACTTGACATTTTATCTTACTAATGATGTTTCTT  
TTTTAGCACATATTCAGTGGATGGTTATGTTACACCTTTAGTACCTTTCTGGATA  
ACAATTGCTTATATCATTTGTATTTCCACAAAGCATTCTATTGGTTCTTTAGTAA  
TTACCTAAAGAGACGTGTAGTCTTTAATGGTGTTCCTTTAGTACTTTTGAAGAA  
GCTGCGCTGTGCACCTTTTTGTAAATAAAGAAATGTATCTAAAGTTGCGTAGTG  
ATGTGCTATTACCTCTTACGCAATATAATAGATACTTAGCTCTTTATAATAAGTAC  
AAGTATTTTAGTGGAGCAATGGATAACAACACTAGCTACAGAGAAGCTGCTTGTGTC  
ATCTCGCAAAGGCTCTCAATGACTTCAGTAACTCAGGTTCTGATGTTCTTTACCA  
ACCACCACAAACCTCTATCACCTCAGCTGTTTTGCAGAGTGGTTTTAGAAAAATG  
GCATTCCCATCTGGTAAAGTTGAGGGTTGTATGGTACAAGTAACTTGTGGTACAA

CTACACTTAACGGTCTTTGGCTTGATGACGTAGTTTACTGTCCAAGACATGTGAT  
CTGCACCTCTGAAGACATGCTTAACCCTAATTATGAAGATTTACTCATTTCGTAAG  
TCTAATCATAATTTCTTGGTACAGGCTGGTAATGTTCAACTCAGGGTTATTGGAC  
ATTCTATGCAAATTGTGTACTTAAGCTTAAGGTTGATACAGCCAATCCTAAGAC  
ACCTAAGTATAAGTTTGTTCGCATTCAACCAGGACAGACTTTTTTCAGTGTTAGCT  
TGTTACAATGGTTCACCATCTGGTGTTTACCAATGTGCTATGAGGCCCAATTTCA  
CTATTAAGGGTTCATTCCCTAATGGTTCATGTGGTAGTGTTGGTTTTAACATAGAT  
TATGACTGTGTCTCTTTTTGTTACATGCACCATATGGAATTACCAACTGGAGTTCA  
TGCTGGCACAGACTTAGAAGGTAACTTTTATGGACCTTTTGTTGACAGGCAAACA  
GCACAAGCAGCTGGTACGGACACAACCTATTACAGTTAATGTTTTAGCTTGGTTGT  
ACGCTGCTGTTATAAATGGAGACAGGTGGTTTCTCAATCGATTTACCACAACCTCT  
TAATGACTTTAACCTTGTGGCTATGAAGTACAATTATGAACCTCTAACACAAGAC  
CATGTTGACATACTAGGACCTCTTCTGCTCAAACCTGGAATTGCCGTTTTAGATAT  
GTGTGCTTCATTAAGAATTACTGCAAATGGTATGAATGGACGTACCATATTG  
GGTAGTGCTTTATTAGAAGATGAATTTACACCTTTTGATGTTGTTAGACAATGCT  
CAGGTGTTACTTTCCAAAGTGCAGTGAAAAGAACAATCAAGGGTACACACCACT  
GGTTGTTACTCACAATTTGACTTCACTTTTAGTTTTAGTCCAGAGTACTCAATGG  
TCTTTGTTCTTTTTTTGTATGAAAATGCCTTTTACCTTTTGCTATGGGTATTATT  
GCTATGTCTGCTTTTGCAATGATGTTTGTCAAACATAAGCATGCATTTCTCTGTTT  
GTTTTGTTACCTTCTCTTGCCACTGTAGCTTATTTAATATGGTCTATATGCCTGC  
TAGTTGGGTGATGCGTATTATGACATGGTTGGATATGGTTGATACTAGTTTGTCT  
GGTTTTAAGCTAAAAGACTGTGTTATGTATGCATCAGCTGTAGTGTTACTAATCC  
TTATGACAGCAAGAACTGTGTATGATGATGGTGCTAGGAGAGTGTGGACACTTA  
TGAATGTCTTGACACTCGTTTATAAAGTTTATTATGGTAATGCTTTAGATCAAGCC  
ATTTCCATGTGGGCTCTTATAATCTCTGTTACTTCTAACTACTCAGGTGTAGTTAC  
AACTGTCATGTTTTTGCCAGAGGTATTGTTTTATGTGTGTTGAGTATTGCCCTA  
TTTTCTTCATAACTGGTAATACACTTCAGTGTATAATGCTAGTTTATTGTTTCTTA  
GGCTATTTTTGTACTTGTTACTTTGGCCTCTTTTGTTTACTCAACCGCTACTTTAGA  
CTGACTCTTGGTGTTTATGATTACTTAGTTTCTACACAGGAGTTTAGATATATGAA  
TTCACAGGGACTACTCCCACCAAGAATAGCATAGATGCCTTCAAACCTCAACATT  
AAATTGTTGGGTGTTGGTGGCAAACCTTGTATCAAAGTAGCCACTGTACAGTCTA  
AAATGTCAGATGTAAAGTGCACATCAGTAGTCTTACTCTCAGTTTTGCAACAACCT  
CAGAGTAGAATCATCATCTAAATTGTGGGCTCAATGTGTCCAGTTACACAATGAC  
ATTCTCTTAGCTAAAGATACTACTGAAGCCTTTGAAAAAATGGTTTCACTACTTT

CTGTTTTGCTTTCCATGCAGGGTGCTGTAGACATAAACAAGCTTTGTGAAGAAAT  
GCTGGACAACAGGGCAACCTTACAAGCTATAGCCTCAGAGTTTAGTTCCTTCCA  
TCATATGCAGCTTTTGCTACTGCTCAAGAAGCTTATGAGCAGGCTGTTGCTAATG  
GTGATTCTGAAGTTGTTCTTAAAAAGTTGAAGAAGTCTTTGAATGTGGCTAAATC  
TGAATTTGACCGTGATGCAGCCATGCAACGTAAGTTGGAAAAGATGGCTGATCA  
AGCTATGACCCAAATGTATAAACAGGCTAGATCTGAGGACAAGAGGGCAAAAGT  
TACTAGTGCTATGCAGACAATGCTTTTCACTATGCTTAGAAAGTTGGATAATGAT  
GCACTCAACAACATTATCAACAATGCAAGAGATGGTTGTGTTCCCTTGAACATAA  
TACCTCTTACAACAGCAGCCAACTAATGGTTGTCATACCAGACTATAACACATA  
TAAAAATACGTGTGATGGTACAACATTTACTTATGCATCAGCATTGTGGGAAATC  
CAACAGGTTGTAGATGCAGATAGTAAAATTGTTCAACTTAGTGAAATTAGTATGG  
ACAATTCACCTAATTTAGCATGGCCTCTTATTGTAACAGCTTTAAGGGCCAATTC  
TGCTGTCAAATTACAGAATAATGAGCTTAGTCCTGTTGCACTACGACAGATGTCT  
TGTGCTGCCGGTACTACACAAACTGCTTGCACTGATGACAATGCGTTAGCTTACT  
ACAACACAACAAAGGGAGGTAGGTTTGTACTTGCACTGTTATCCGATTTACAGG  
ATTTGAAATGGGCTAGATTCCTAAGAGTGATGGAACCTGGTACTATCTATACAGA  
ACTGGAACCACCTTGTAGGTTTGTACAGACACACCTAAAGGTCCTAAAGTGAA  
GTATTTATACTTTATTAAAGGATTAACAACCTAAATAGAGGTATGGTACTTGGT  
AGTTTAGCTGCCACAGTACGTCTACAAGCTGGTAATGCAACAGAAGTGCCTGCC  
AATTCAACTGTATTATCTTTCTGTGCTTTTGCTGTAGATGCTGCTAAAGCTTACAA  
AGATTATCTAGCTAGTGGGGGACAACCAATCACTAATTGTGTTAAGATGTTGTGT  
ACACACACTGGTACTGGTCAGGCAATAACAGTTACACCGGAAGCCAATATGGAT  
CAAGAATCCTTTGGTGGTGCATCGTGTGTGTCTGTACTGCCGTTGCCACATAGATC  
ATCCAAATCCTAAAGGATTTTGTGACTTAAAAGGTAAGTATGTACAAATACCTAC  
AACTTGTGCTAATGACCCTGTGGGTTTTACACTTAAAAACACAGTCTGTACCGTC  
TGCGGTATGTGGAAAGGTTATGGCTGTAGTTGTGATCAACTCCGCGAACCCATGC  
TTCAGTCAGCTGATGCACAATCGTTTTTAAACGGGTTTGCGGTGTAAGTGCAGCC  
CGTCTTACACCGTGCGGCACAGGCACTAGTACTGATGTCGTATACAGGGCTTTTG  
ACATCTACAATGATAAAGTAGCTGGTTTTGCTAAATTCCTAAAACTAATTGTTG  
TCGCTTCCAAGAAAAGGACGAAGATGACAATTTAATTGATTCTTACTTTGTAGTT  
AAGAGACACACTTTCTCTAACTACCAACATGAAGAAACAATTTATAATTTACTTA  
AGGATTGTCCAGCTGTTGCTAAACATGACTTCTTTAAGTTTAGAATAGACGGTGA  
CATGGTACCACATATATCACGTCAACGTCTTACTAAATACACAATGGCAGACCTC  
GTCTATGCTTTAAGGCATTTTGTGATGAAGGTAATTGTGACACATTAAGAAATAC



TTGTCACATACAATTGTTGTGATGATGATTATTTCAATAAAAAGGACTGGTATGA  
TTTTGTAGAAAACCCAGATATATTACGCGTATACGCCAACTTAGGTGAACGTGTA  
CGCCAAGCTTTGTTAAAAACAGTACAATTCTGTGATGCCATGCGAAATGCTGGTA  
TTGTTGGTGTACTGACATTAGATAATCAAGATCTCAATGGTAACTGGTATGATTT  
CGGTGATTTTCATACAAACCACGCCAGGTAGTGGAGTTCCTGTTGTAGATTCTTAT  
TATTCATTGTTAATGCCTATATTAACCTTGACCAGGGCTTTAACTGCAGAGTCAC  
ATGTTGACACTGACTTAACAAAGCCTTACATTAAGTGGGATTTGTTAAAATATGA  
CTTCACGGAAGAGAGGTTAAAACCTTTTGACCGTTATTTTAAATATTGGGATCAG  
ACATAACCACCAAATTGTGTTAACTGTTTGGATGACAGATGCATTCTGCATTGTG  
CAAACCTTTAATGTTTTATTCTCTACAGTGTCCACCTACAAGTTTTGGACCACTA  
GTGAGAAAAATATTTGTTGATGGTGTCCATTTGTAGTTTCAACTGGATAACCACT  
TCAGAGAGCTAGGTGTTGTACATAATCAGGATGTAACTTACATAGCTCTAGACT  
TAGTTTTAAGGAATTACTTGTGTATGCTGCTGACCCTGCTATGCACGCTGCTTCTG  
GTAATCTATTACTAGATAAACGCACTACGTGCTTTTCAGTAGCTGCACTTACTAA  
CAATGTTGCTTTTCAAACGTGCAAACCCGGTAATTTTAAACAAAGACTTCTATGAC  
TTTGCTGTGTCTAAGGGTTTCTTTAAGGAAGGAAGTTCTGTTGAATTA AACACT  
TCTTCTTTGCTCAGGATGGTAATGCTGCTATCAGCGATTATGACTACTATCGTTAT  
AATCTACCAACAATGTGTGATATCAGACA ACTACTATTTGTAGTTGAAGTTGTTG  
ATAAGTACTTTGATTGTTACGATGGTGGCTGTATTAATGCTAACCAAGTCATCGT  
CAACAACCTAGACAAATCAGCTGGTTTTCCATTTAATAAATGGGGTAAGGCTAG  
ACTTTATTATGATTCAATGAGTTATGAGGATCAAGATGCACTTTTCGCATATACA  
AAACGTAATGTCATCCCTACTATAACTCAAATGAATCTTAAGTATGCCATTAGTG  
CAAAGAATAGAGCTCGCACCGTAGCTGGTGTCTCTATCTGTAGTACTATGACCAA  
TAGACAGTTTCATCAAAAATTATTGAAATCAATAGCCGCCACTAGAGGAGCTACT  
GTAGTAATTGGAACAAGCAAATTCTATGGTGGTTGGCACAACATGTTAAAAACT  
GTTTATAGTGATGTAGAAAACCCTCACCTTATGGGTTGGGATTATCCTAAATGTG  
ATAGAGCCATGCCTAACATGCTTAGAATTATGGCCTCACTTGTCTTGCTCGCAA  
ACATAACCGTGTTGTAGCTTGTACACCGTTTCTATAGATTAGCTAATGAGTGT  
GCTCAAGTATTGAGTGAAATGGTCATGTGTGGCGGTTCACTATATGTTAAACCAG  
GTGGAACCTCATCAGGAGATGCCACA ACTGCTTATGCTAATAGTGTTTTTAACAT  
TTGTCAAGCTGTCACGGCCAATGTTAATGCACTTTTATCTACTGATGGTAAACAAA  
ATTGCCGATAAGTATGTCCGCAATTTACAACACAGACTTTATGAGTGTCTCTATA  
GAAATAGAGATGTTGACACAGACTTTGTGAATGAGTTTTACGCATATTTGCGTAA  
ACATTTCTCAATGATGATACTCTCTGACGATGCTGTTGTGTGTTTCAATAGCACTT

ATGCATCTCAAGGTCTAGTGGCTAGCATAAAGAACTTTAAGTCAGTTCTTTATTA  
TCAAACAATGTTTTTATGTCTGAAGCAAATGTTGGACTGAGACTGACCTTACT  
AAAGGACCTCATGAATTTTGCTCTCAACATACAATGCTAGTTAAACAGGGTGATG  
ATTATGTGTACCTTCCTTACCCAGATCCATCAAGAATCCTAGGGGCCGGCTGTTT  
TGTAGATGATATCGTAAAAACAGATGGTACACTTATGATTGAACGGTTCGTGTCT  
TTAGCTATAGATGCTTACCCACTTACTAAACATCCTAATCAGGAGTATGCTGATG  
TCTTTCATTTGTACTIONTACAATACATAAGAAAGCTACATGATGAGTTAACAGGACA  
CATGTTAGACATGTATTCTGTTATGCTTACTAATGATAAACACTTCAAGGTATTGG  
GAACCTGAGTTTTATGAGGCTATGTACACACCCGCATACAGTCTTACAGGCTGTTG  
GGGCTTGTGTTCTTTGCAATTCACAGACTTCATTAAGATGTGGTGCTTGCATACGT  
AGACCATTCTTATGTTGTAAATGCTGTTACGACCATGTCATATCAACATCACATA  
AATTAGTCTTGTCTGTTAATCCGTATGTTTGCAATGCTCCAGGTTGTGATGTCACA  
GATGTGACTCAACTTTACTTAGGAGGTATGAGCTATTATTGTAAATCACATAAAC  
CACCCATTAGTTTTCCATTGTGTGCTAATGGACAAGTTTTTGGTTTATATAAAAAT  
ACATGTGTTGGTAGCGATAATGTTACTGACTTTAATGCAATTGCAACATGTGACT  
GGACAAATGCTGGTGATTACATTTTAGCTAACACCTGTACTGAAAGACTCAAGCT  
TTTTGCAGCAGAAACGCTCAAAGCTACTGAGGAGACATTTAAACTGTCTTATGGT  
ATTGCTACTGTACGTGAAGTGCTGTCTGACAGAGAATTACATCTTTCATGGGAAG  
TTGGTAAACCTAGACCACCACTTAACCGAAATTATGTCTTTACTGGTTATCGTGT  
AACTAAAAACAGTAAAGTACAAATAGGAGAGTACACCTTTGAAAAAGGTGACTA  
TGGTGATGCTGTTGTTTACCGAGGTACAACAACCTTACAAATTAATGTTGGTGAT  
TATTTTGTGCTGACATCACATACAGTAATGCCATTAAGTGCACCTACACTAGTGC  
CACAAGAGCACTATGTTAGAATTACTGGCTTATACCCAACACTCAATATCTCAGA  
TGAGTTTTCTAGCAATGTTGCAAATTATCAAAGGTTGGTATGCAAAGTATTCT  
ACACTCCAGGGACCACCTGGTACTGGTAAGAGTCATTTTGCTATTGGCCTAGCTC  
TCTACTACCCTTCTGCTCGCATAGTGTATACAGCTTGCTCTCATGCCGCTGTTGAT  
GCACTATGTGAGAAGGCATTAATAATATTTGCCTATAGATAAATGTAGTAGAATTA  
TACCTGCACGTGCTCGTGTAGAGTGTTTTGATAAATTCAAAGTGAATTCAACATT  
AGAACAGTATGTCTTTTGTACTGTAAATGCATTGCCTGAGACGACAGCAGATATA  
GTTGTCTTTGATGAAATTTCAATGGCCACAAATTATGATTTGAGTGTTGTCAATG  
CCAGATTACGTGCTAAGCACTATGTGTACATTGGCGACCCTGCTCAATTACCTGC  
ACCACGCACATTGCTAACTAAGGGCACACTAGAACCAGAATATTTCAATTCAGT  
GTGTAGACTTATGAAAATATAGGTCCAGACATGTTCCCTCGGAACTTGTCGGCGT  
TGTCTGCTGAAATTGTTGACACTGTGAGTGCTTTGGTTTATGATAATAAGCTTA

AAGCACATAAAGACAAATCAGCTCAATGCTTTAAAATGTTTTATAAGGGTGTTAT  
CACGCATGATGTTTCATCTGCAATTAACAGGCCACAAATAGGCGTGGTAAGAGA  
ATTCCTTACACGTAACCCTGCTTGGAGAAAAGCTGTCTTTATTTACCTTATAATT  
CACAGAATGCTGTAGCCTCAAAGATTTTGGGACTACCAACTCAAAGTGTGATTC  
ATCACAGGGCTCAGAATATGACTATGTCATATTCCTCAAACCACTGAAACAGCT  
CACTCTTGTAATGTAAACAGATTTAATGTTGCTATTACCAGAGCAAAAGTAGGCA  
TACTTTGCATAATGTCTGATAGAGACCTTTATGACAAGTTGCAATTTACAAGTCT  
TGAAATTCACGTAGGAATGTGGCAACTTTACAAGCTGAAAATGTAACAGGACT  
CTTTAAAGATTGTAGTAAGGTAATCACTGGGTTACATCCTACACAGGCACCTACA  
CACCTCAGTGTTGACACTAAATTCAAAAGTGAAGGTTTATGTGTTGACATACCTG  
GCATACCTAAGGACATGACCTATAGAAGACTCATCTCTATGATGGGTTTTAAAAT  
GAATTATCAAGTTAATGGTTACCCTAACATGTTTATCACCCGCGAAGAAGCTATA  
AGACATGTACGTGCATGGATTGGCTTCGATGTCGAGGGGTGTCATGCTACTAGAG  
AAGCTGTTGGTACCAATTTACCTTTACAGCTAGGTTTTTCTACAGGTGTTAACCTA  
GTTGCTGTACCTACAGGTTATGTTGATACACCTAATAATACAGATTTTTCCAGAG  
TTAGTGCTAAACCACCGCCTGGAGATCAATTTAAACACCTCATAACCACTTATGTA  
CAAAGGACTTCCTTGGAATGTAGTGCGTATAAAGATTGTACAAATGTTAAGTGAC  
ACACTTAAAATCTCTCTGACAGAGTCGTATTTGTCTTATGGGCACATGGCTTTG  
AGTTGACATCTATGAAGTATTTTGTGAAAATAGGACCTGAGCGCACCTGTTGTCT  
ATGTGATAGACGTGCCACATGCTTTTCCACTGCTTCAGACACTTATGCCTGTTGG  
CATCATTCTATTGGATTTGATTACGTCTATAATCCGTTTATGATTGATGTTCAACA  
ATGGGGTTTTACAGGTAACCTACAAAGCAACCATGATCTGTATTGTCAAGTCCAT  
GGTAATGCACATGTAGCTAGTTGTGATGCAATCATGACTAGGTGTCTAGCTGTCC  
ACGAGTGCTTTGTTAAGCGTGTTGACTGGACTATTGAATATCCTATAATTGGTGA  
TGAAGTGAAGATTAATGCGGCTTGTAGAAAGGTTCAACACATGGTTGTTAAAGCT  
GCATTATTAGCAGACAAATTCACAGTTCTTCACGACATTGGTAACCCTAAAGCTA  
TTAAGTGTGTACCTCAAGCTGATGTAGAATGGAAGTTCTATGATGCACAGCCTTG  
TAGTGACAAAGCTTATAAAATAGAAGAATTATTCTATTCTTATGCCACACATTCT  
GACAAATTCACAGATGGTGTATGCCTATTTTGGAAATTGCAATGTCGATAGATATC  
CTGCTAATTCCATTGTTTGTAGATTTGACACTAGAGTGCTATCTAACCTTAACTTG  
CCTGGTTGTGATGGTGGCAGTTTGTATGTAAATAAACATGCATTCCACACACCAG  
CTTTTGATAAAAGTGCTTTTGTTAATTTAAAACAATTACCATTTTTCTATTACTCT  
GACAGTCCATGTGAGTCTCATGGAAAACAAGTAGTGTCAGATATAGATTATGTA  
CCACTAAAGTCTGCTACGTGTATAACACGTTGCAATTTAGGTGGTGCTGTCTGTA

GACATCATGCTAATGAGTACAGATTGTATCTCGATGCTTATAACATGATGATCTC  
AGCTGGCTTTAGCTTGTGGGTTTACAAACAATTTGATACTTATAACCTCTGGAAC  
ACTTTTACAAGACTTCAGAGTTTAGAAAATGTGGCTTTTAATGTTGTAAATAAGG  
GACACTTTGATGGACAACAGGGTGAAGTACCAGTTTCTATCATTAAATAACACTGT  
TTACACAAAAGTTGATGGTGTGATGTAGAATTGTTTGAAAATAAAAACAACATTA  
CCTGTTAATGTAGCATTGAGCTTTGGGCTAAGCGCAACATTAACCAGTACCAG  
AGGTGAAAATACTCAATAATTTGGGTGTGGACATTGCTGCTAATACTGTGATCTG  
GGACTACAAAAGAGATGCTCCAGCACATATCTACTATTGGTGTGTTTGTCTATG  
ACTGACATAGCCAAGAAACCAACTGAAACGATTTGTGCACCACTCACTGTCTTTT  
TTGATGGTAGAGTTGATGGTCAAGTAGACTTATTTAGAAATGCCCGTAATGGTGT  
TCTTATTACAGAAGGTAGTGTTAAAGGTTTACAACCATCTGTAGGTCCCAAACAA  
GCTAGTCTTAATGGAGTCACATTAATTGGAGAAGCCGTAAAAACACAGTTCAATT  
ATTATAAGAAAGTTGATGGTGTGTTGCCAACAATTACCTGAAACTTACTTTACTCA  
GAGTAGAAATTTACAAGAATTTAAACCCAGGAGTCAAATGGAAATTGATTTCTT  
AGAATTAGCTATGGATGAATTCATTGAACGGTATAAATTAGAAGGCTATGCCTTC  
GAACATATCGTTTATGGAGATTTTAGTCATAGTCAGTTAGGTGGTTTACATCTAC  
TGATTGGACTAGCTAAACGTTTTAAGGAATCACCTTTTGAATTAGAAGATTTTAT  
TCCTATGGACAGTACAGTTAAAACTATTTCATAACAGATGCGCAAACAGGTTCA  
TCTAAGTGTGTGTTCTGTTATTGATTTATTACTTGATGATTTTGTGAAATAAT  
AAAATCCCAAGATTTATCTGTAGTTTCTAAGGTTGTCAAAGTGACTATTGACTAT  
ACAGAAATTTCAATTTATGCTTTGGTGTAAAGATGGCCATGTAGAAACATTTTACC  
CAAATTACAATCTAGTCAAGCGTGGCAACCGGGTGTGCTATGCCTAATCTTTA  
CAAATGCAAAGAATGCTATTAGAAAAGTGTGACCTTCAAATTATGGTGATAG  
TGCAACATTACCTAAAGGCATAATGATGAATGTCGCAAATATACTCAACTGTGT  
CAATATTTAAACACATTAACATTAGCTGTACCCTATAATATGAGAGTTATACATT  
TTGGTGCTGGTTCTGATAAAGGAGTTGCACCAGGTACAGCTGTTTTAAGACAGTG  
GTTGCCTACGGGTACGCTGCTTGTGCGATTCAGATCTTAATGACTTTGTCTCTGATG  
CAGATTCAACTTTGATTGGTGATTGTGCAACTGTACATACAGCTAATAAATGGGA  
TCTCATTATTAGTGATATGTACGACCCTAAGACTAAAAATGTTACAAAAGAAAAT  
GACTCTAAAGAGGGTTTTTTCACTTACATTTGTGGGTTTATACAACAAAAGCTAG  
CTCTTGGAGGTTCCGTGGCTATAAAGATAACAGAACATTCTTGGAATGCTGATCT  
TTATAAGCTCATGGGACACTTCGCATGGTGGACAGCCTTTGTTACTAATGTGAAT  
GCGTCATCATCTGAAGCATTTTTAATTGGATGTAATTATCTTGGCAAACCACGCG  
AACAAATAGATGGTTATGTCATGCATGCAAATTACATATTTTGGAGGAATACAA

ATCCAATTCAGTTGTCTTCCTATTCTTTATTTGACATGAGTAAATTTCCCCTTAAA  
TTAAGGGGTACTGCTGTTATGTCTTTAAAAGAAGGTCAAATCAATGATATGATTT  
TATCTCTTCTTAGTAAAGGTAGACTTAT

>S

ATTAAAGGTTTATACCTTCCCAGGTAACAAACCAACCAACTTTCGATCTCTTGTA  
GATCTGTTCTCTAAACGAACAATGTTTGTTTTTCTTGTTTTATTGCCACTAGTCTCT  
AGTCAGTGTGTTAATCTTACAACCAGAACTCAATTACCCCCTGCATACACTAATT  
CTTTCACACGTGGTGTATTACCCTGACAAAGTTTTTCAGATCCTCAGTTTTACAT  
TCAACTCAGGACTTGTTCTTACCTTTCTTTTCCAATGTTACTTGGTTCCATGCTAT  
ACATGTCTCTGGGACCAATGGTACTAAGAGGTTTGATAACCCTGTCCTACCATTT  
AATGATGGTGTATTATTTTGCTTCCACTGAG

>ORF3a

ATTAAAGGTTTATACCTTCCCAGGTAACAAACCAACCAACTTTCGATCTCTTGTA  
GATCTGTTCTCTAAACGAACCTTATGGATTTGTTTATGAGAATCTTCACAATTGGA  
ACTGTAACCTTGAAGCAAGGTGAAATCAAGGATGCTACTCCTTCAGATTTTGTTTC  
GCGCTACTGCAACGATACCGATAACAAGCCTCACTCCCTTTCGGATGGCTTATTGT  
TGCGGTTGCACTTCTTGCTGTTTTTCAGAGCGCTTCCAAAATCATAACCCTCAA  
AAGAGATGGC

>E

ATTAAAGGTTTATACCTTCCCAGGTAACAAACCAACCAACTTTCGATCTCTTGTA  
GATCTGTTCTCTAAACGAACCTTATGTACTCATTCGTTTCGGAAGAGACAGGTACG  
TTAATAGTTAATAGCGTACTTCTTTTTCTTGCTTTCGTGGTATTCTTGCTAGTTACA  
CTAGCCATCCTTACTGCGCTTCGATTGTGTGCGTACTGCTGCAATATTGTTAACGT  
GAGTCTTGTA

>M

ATTAAAGGTTTATACCTTCCCAGGTAACAAACCAACCAACTTTCGATCTCTTGTA  
GATCTGTTCTCTAAACGAACCTAAATATTATATTAGTTTTTCTGTTTGGAACCTTAA  
TTTTAGCCATGGCAGATTCCAACGGTACTATTACCGTTGAAGAGCTTAAAAAGCT  
CCTTGAACAATGGAACCTAGTAATAGGTTTCCTATTCTTACATGGATTTGTCTTC  
TACAATTTGCCTATGCCAACAGGAA

>ORF6

ATTAAAGGTTTATACCTTCCCAGGTAACAAACCAACCAACTTTCGATCTCTTGTA  
GATCTGTTCTCTAAACGAACGCTTTCTTATTACAAATTGGGAGCTTCGCAGCGTG  
TAGCAGGTGACTCAGGTTTTGCTGCATACAGTCGCTACAGGATTGGCAACTATAA  
ATTAAACACAGACCATTCCAGTAGCAGTGACAATATTGCTTTGCTTGTACAGTAA  
GTGACAACAGATGTTTCATCTCGTTGACTTTCAGGTTACTATAGCAGAGATATTA  
CTAA

>ORF7a

ATTAAAGGTTTATACCTTCCCAGGTAACAAACCAACCAACTTTCGATCTCTTGTA  
GATCTGTTCTCTAAACGAACATGAAAATTATTCTTTTCTTGGCACTGATAACACTC  
GCTACTTGTGAGCTTTATCACTACCAAGAGTGTGTTAGAGGTACAACAGTACTTT  
TAAAAGAACCTTGCTCTTCTGGAACATACGAGGGCAATTCACCATTTTCATCCTCT  
AGCTGATAACAAATTTGCACTGACTTGCTTTAGCACTCAATTTGCTTTTGCTTGTC  
CTGACGGCGTAAAACACGTCTATCAGTTACGTGCCAGATCAGTTTCACCTAAACT

>ORF7b

ATTAAAGGTTTATACCTTCCCAGGTAACAAACCAACCAACTTTCGATCTCTTGTA  
GATCTGTTCTCTAAACTGTTTCATCAGACAAGAGGAAGTTCAAGAACTTTACTCTC  
CAATTTTTCTTATTGTTGCGGCAATAGTGTTTATAACACTTTGCTTCACACTCAA  
AGAAAGACAGAATGATTGAACTTTCATTAATTGACTTCTATTTGTGCTTTTTAGCC  
TTTCTGCTATTCCTTGTTTTAATTATGCTTATTATCTTTTGGTTCTCACTTGA

>ORF8

ATTAAAGGTTTATACCTTCCCAGGTAACAAACCAACCAACTTTCGATCTCTTGTA  
GATCTGTTCTCTAAACGAACATGAAATTTCTTGTTTTCTTAGGAATCATCACA  
GTAGCTGCATTTACCAAGAATGTAGTTTACAGTCATGTA

>N

ATTAAAGGTTTATACCTTCCCAGGTAACAAACCAACCAACTTTCGATCTCTTGTA  
GATCTGTTCTCTAAACGAACAACTAAAATGTCTGATAATGGACCCCAAATCA

GCGAAATGCACCCCGCATTACGTTTGGTGGACCCTCAGATTCAACTGGCAGTAAC  
 CAGAATGGAGAACGCAGTGGGGCGCGATCAAACAACGTCGGCCCCAAGGTTTA  
 CCCAATAATACTGCGTCTTGGTTCACCGCTCTCACTCAACATGGCAAGGAAGACC  
 TTAAATTCCTCGAGGACAAGGCGTTCCAATTAACAC

>ORF10-15

ATTAAAGGTTTATACCTTCCCAGGTAACAAACCAACCAACTTTCGATCTCTTGTA  
 GATCTGTTCTCTAAACTCATGCAGACCACACAAGGCAGATGGGCTATATAAACGT  
 TTTTCGCTTTTCCGTTTACGATATATAGTCTACTCTTGTGCAGAATGAATTCTCGTA  
 ACTACATAGCACAAGTAGATGTAGTTAACTTTAATCTCACATAGCAATCTTTAAT  
 CAGTGTGTAACATTAGGGAGGACTTGAAAGAGCCACCACATTTTCACCGAGGCC  
 ACGCGGAGTACGATCGAGTGTACAGTGAACAATGCTAGGGAGAGCTGCCTATAT  
 GGAAGAGCCCTAATGTGTAAAATTAAT

Supplementary Table S1. Table showing the position of the forward primer in each of the two Ampliseq pools as well as the predicted amplicon length from virus genome RNA and the individual subgenomic RNAs. Short subgenomic amplicons are indicated in bold type.

| Forward primer | Forward primer 3'-end | Virus genome RNA | S Orf2     | Orf3a      | E Orf4    | M Orf5    | Orf6      | Orf7a     | Orf7b     | Orf8      | N Orf9     | Orf10     |
|----------------|-----------------------|------------------|------------|------------|-----------|-----------|-----------|-----------|-----------|-----------|------------|-----------|
| Pool 1         | 41                    | 190              | 265        | <b>120</b> | 143       | 170       | <b>83</b> | 237       | 239       | 224       | <b>105</b> | 226       |
| Pool 2         | 51                    | 227              | <b>127</b> | 198        | <b>88</b> | <b>85</b> | 161       | <b>85</b> | <b>75</b> | <b>49</b> | 221        | <b>17</b> |

Supplementary Table S2. Table showing the number of reads mapped to each individual amplicon and additional information such as the total sum of virus reads, total number of reads mapping to the first 21500 nucleotides of the virus genome (thus not overlapping with any potential subgenomic SARS-CoV-2 RNAs) as well as the average number of reads and minimum and maximum number of reads mapped to the individual virus and control cellular RNA amplicons.

IonXpress\_033\_cov\_test4

| Reference | Start | End Amplicon Name   | Pool              | Amplicon Length | GC-14/33 | GC-11/34 | GC-13/35 | GC-12/36 | GC-14/37 | GC11/38 | GC-23/60 | GC-24/61 | GC-51/62 | GC-20/63 | GC-21/64 | GC-25/65 | GC-26/66 | GC-28/67 | GC-55/68 |
|-----------|-------|---------------------|-------------------|-----------------|----------|----------|----------|----------|----------|---------|----------|----------|----------|----------|----------|----------|----------|----------|----------|
|           |       |                     |                   |                 |          |          |          |          |          |         |          |          |          |          |          |          |          |          |          |
| 2019-nCoV | 42    | 229 r1_1.1.363702   | GENE_ID=r1;Pool=1 | 187             | 331      | 320      | 44       | 1        | 12996    | 11707   | 2034     | 258      | 23       | 0        | 0        | 13       | 136018   | 0        | 40       |
| 2019-nCoV | 52    | 276 r1_1.1.80142    | GENE_ID=r1;Pool=2 | 224             | 212      | 187      | 19       | 1        | 11208    | 10201   | 417      | 89       | 17       | 0        | 0        | 1        | 21424    | 0        | 2        |
| 2019-nCoV | 258   | 483 r1_1.1.876634   | GENE_ID=r1;Pool=1 | 225             | 69       | 85       | 22       | 0        | 444      | 273     | 37       | 23       | 4        | 0        | 0        | 4        | 2476     | 0        | 20       |
| 2019-nCoV | 316   | 535 r1_1.1.592753   | GENE_ID=r1;Pool=2 | 219             | 431      | 239      | 30       | 0        | 16788    | 12412   | 6694     | 600      | 106      | 0        | 0        | 3        | 78311    | 0        | 12       |
| 2019-nCoV | 513   | 699 r1_1.1.409836   | GENE_ID=r1;Pool=1 | 186             | 246      | 117      | 112      | 2        | 38828    | 21559   | 122842   | 13969    | 1162     | 0        | 3        | 4        | 225287   | 0        | 30       |
| 2019-nCoV | 572   | 794 r1_1.1.330218   | GENE_ID=r1;Pool=2 | 222             | 202      | 131      | 7        | 3        | 6448     | 5358    | 765      | 74       | 5        | 0        | 0        | 3        | 17916    | 0        | 5        |
| 2019-nCoV | 732   | 958 r1_1.1.698273   | GENE_ID=r1;Pool=1 | 226             | 75       | 116      | 46       | 0        | 18354    | 9670    | 3322     | 358      | 91       | 0        | 0        | 9        | 85191    | 0        | 12       |
| 2019-nCoV | 839   | 1060 r1_1.2.1238102 | GENE_ID=r1;Pool=2 | 221             | 305      | 151      | 15       | 2        | 8104     | 6716    | 188      | 64       | 7        | 0        | 0        | 1        | 18592    | 0        | 3        |
| 2019-nCoV | 996   | 1194 r1_1.2.48265   | GENE_ID=r1;Pool=1 | 198             | 45       | 89       | 61       | 2        | 13238    | 7143    | 63       | 24       | 0        | 0        | 0        | 0        | 5982     | 0        | 17       |
| 2019-nCoV | 1127  | 1309 r1_1.2.1223038 | GENE_ID=r1;Pool=2 | 182             | 310      | 188      | 35       | 1        | 17621    | 12835   | 179      | 35       | 1        | 0        | 0        | 0        | 11911    | 0        | 0        |
| 2019-nCoV | 1235  | 1418 r1_1.2.1317379 | GENE_ID=r1;Pool=1 | 183             | 145      | 103      | 125      | 4        | 43815    | 16428   | 8233     | 794      | 80       | 0        | 0        | 6        | 79453    | 0        | 22       |
| 2019-nCoV | 1355  | 1569 r1_1.2.203434  | GENE_ID=r1;Pool=2 | 214             | 293      | 145      | 32       | 4        | 9959     | 6485    | 699      | 147      | 17       | 0        | 0        | 4        | 29613    | 0        | 7        |
| 2019-nCoV | 1459  | 1678 r1_1.2.674295  | GENE_ID=r1;Pool=1 | 219             | 115      | 102      | 53       | 0        | 24557    | 12566   | 2749     | 276      | 57       | 0        | 0        | 2        | 95763    | 0        | 66       |
| 2019-nCoV | 1611  | 1833 r1_1.2.760850  | GENE_ID=r1;Pool=2 | 222             | 269      | 144      | 15       | 1        | 11599    | 9596    | 2        | 1        | 0        | 0        | 0        | 0        | 691      | 0        | 1        |
| 2019-nCoV | 1721  | 1904 r1_1.2.843599  | GENE_ID=r1;Pool=1 | 183             | 15       | 80       | 56       | 1        | 20875    | 9103    | 387      | 77       | 14       | 0        | 0        | 0        | 19077    | 0        | 8        |
| 2019-nCoV | 1879  | 2092 r1_1.3.718077  | GENE_ID=r1;Pool=2 | 213             | 185      | 122      | 10       | 1        | 6889     | 5401    | 339      | 83       | 16       | 0        | 0        | 4        | 15333    | 0        | 3        |
| 2019-nCoV | 1945  | 2161 r1_1.3.795369  | GENE_ID=r1;Pool=1 | 216             | 60       | 94       | 55       | 3        | 18101    | 8005    | 2350     | 191      | 28       | 0        | 0        | 2        | 71611    | 0        | 39       |
| 2019-nCoV | 2136  | 2351 r1_1.3.211095  | GENE_ID=r1;Pool=2 | 215             | 354      | 149      | 14       | 0        | 7892     | 6754    | 33       | 14       | 3        | 0        | 0        | 0        | 4317     | 0        | 1        |
| 2019-nCoV | 2206  | 2423 r1_1.3.868087  | GENE_ID=r1;Pool=1 | 217             | 24       | 71       | 42       | 7        | 14780    | 6572    | 1        | 3        | 0        | 0        | 0        | 0        | 655      | 0        | 20       |
| 2019-nCoV | 2398  | 2616 r1_1.3.760885  | GENE_ID=r1;Pool=2 | 218             | 169      | 108      | 22       | 5        | 8147     | 5014    | 46       | 21       | 0        | 0        | 0        | 1        | 6604     | 0        | 1        |
| 2019-nCoV | 2464  | 2666 r1_1.3.27562   | GENE_ID=r1;Pool=1 | 202             | 39       | 63       | 68       | 9        | 24984    | 10434   | 518      | 89       | 3        | 0        | 0        | 7        | 28508    | 0        | 14       |
| 2019-nCoV | 2662  | 2845 r1_1.3.942939  | GENE_ID=r1;Pool=2 | 183             | 409      | 220      | 43       | 12       | 22261    | 12767   | 28199    | 2433     | 67       | 0        | 3        | 12       | 111104   | 0        | 86       |
| 2019-nCoV | 2711  | 2925 r1_1.3.1425694 | GENE_ID=r1;Pool=1 | 214             | 76       | 101      | 54       | 4        | 13835    | 8024    | 1723     | 257      | 40       | 0        | 0        | 6        | 38388    | 0        | 31       |
| 2019-nCoV | 2889  | 3045 r1_1.4.349942  | GENE_ID=r1;Pool=2 | 156             | 551      | 201      | 42       | 0        | 18810    | 12984   | 116707   | 12918    | 1050     | 1        | 43       | 6        | 143811   | 0        | 341      |
| 2019-nCoV | 2966  | 3183 r1_1.4.711815  | GENE_ID=r1;Pool=1 | 217             | 45       | 74       | 26       | 0        | 13091    | 5994    | 698      | 93       | 10       | 0        | 0        | 0        | 38374    | 0        | 24       |
| 2019-nCoV | 3092  | 3294 r1_1.4.1074728 | GENE_ID=r1;Pool=2 | 202             | 139      | 117      | 19       | 1        | 5015     | 3157    | 1238     | 231      | 24       | 0        | 0        | 1        | 11281    | 0        | 1        |
| 2019-nCoV | 3232  | 3453 r1_1.4.295991  | GENE_ID=r1;Pool=1 | 221             | 21       | 70       | 38       | 2        | 7855     | 4876    | 10       | 2        | 1        | 0        | 0        | 0        | 1943     | 0        | 7        |
| 2019-nCoV | 3342  | 3555 r1_1.4.541570  | GENE_ID=r1;Pool=2 | 213             | 229      | 141      | 22       | 0        | 7823     | 6135    | 332      | 76       | 0        | 0        | 0        | 0        | 20097    | 0        | 1        |
| 2019-nCoV | 3495  | 3704 r1_1.4.827492  | GENE_ID=r1;Pool=1 | 209             | 85       | 124      | 66       | 4        | 17193    | 7805    | 1524     | 274      | 185      | 0        | 0        | 3        | 31204    | 0        | 11       |
| 2019-nCoV | 3603  | 3824 r1_1.4.1477602 | GENE_ID=r1;Pool=2 | 221             | 331      | 171      | 10       | 2        | 4515     | 4504    | 37       | 20       | 0        | 0        | 0        | 1        | 4132     | 0        | 2        |
| 2019-nCoV | 3750  | 3972 r1_1.5.1438148 | GENE_ID=r1;Pool=1 | 222             | 25       | 118      | 21       | 0        | 4478     | 3353    | 1        | 0        | 0        | 0        | 0        | 1        | 303      | 0        | 31       |
| 2019-nCoV | 3891  | 4110 r1_1.5.75163   | GENE_ID=r1;Pool=2 | 219             | 225      | 143      | 11       | 2        | 6360     | 5391    | 4        | 1        | 0        | 0        | 0        | 0        | 491      | 0        | 0        |
| 2019-nCoV | 4019  | 4239 r1_1.5.1289446 | GENE_ID=r1;Pool=1 | 220             | 36       | 70       | 36       | 1        | 15903    | 10965   | 43       | 16       | 1        | 0        | 0        | 1        | 8247     | 0        | 27       |
| 2019-nCoV | 4162  | 4390 r1_1.5.1160650 | GENE_ID=r1;Pool=2 | 228             | 344      | 166      | 38       | 2        | 16795    | 14999   | 29       | 11       | 1        | 0        | 0        | 0        | 5665     | 0        | 0        |
| 2019-nCoV | 4278  | 4485 r1_1.5.937589  | GENE_ID=r1;Pool=1 | 207             | 122      | 135      | 123      | 15       | 23760    | 1399    | 150      | 2        | 5        | 0        | 0        | 1        | 11558    | 0        | 36       |
| 2019-nCoV | 4435  | 4646 r1_1.5.550596  | GENE_ID=r1;Pool=2 | 211             | 421      | 179      | 25       | 0        | 8952     | 8260    | 751      | 171      | 71       | 0        | 0        | 1        | 32229    | 0        | 2        |
| 2019-nCoV | 4528  | 4749 r1_1.5.964995  | GENE_ID=r1;Pool=1 | 221             | 67       | 62       | 62       | 0        | 12490    | 300     | 58       | 0        | 3        | 0        | 0        | 3        | 8531     | 0        | 42       |
| 2019-nCoV | 4688  | 4875 r1_1.5.829770  | GENE_ID=r1;Pool=2 | 187             | 428      | 117      | 32       | 4        | 15539    | 10948   | 7052     | 522      | 12       | 0        | 0        | 2        | 74240    | 0        | 6        |
| 2019-nCoV | 4805  | 5027 r1_1.6.398377  | GENE_ID=r1;Pool=1 | 222             | 50       | 111      | 179      | 0        | 13463    | 11409   | 709      | 98       | 0        | 0        | 0        | 2        | 54955    | 0        | 19       |
| 2019-nCoV | 4920  | 5129 r1_1.6.1402513 | GENE_ID=r1;Pool=2 | 209             | 323      | 129      | 7        | 0        | 5229     | 3923    | 223      | 45       | 3        | 0        | 0        | 1        | 15490    | 0        | 3        |
| 2019-nCoV | 5074  | 5280 r1_1.6.986997  | GENE_ID=r1;Pool=1 | 206             | 25       | 77       | 174      | 0        | 17191    | 9697    | 494      | 53       | 5        | 0        | 0        | 0        | 36135    | 0        | 9        |



IonXpress\_033\_cov\_test4

|           |       |                       |                   |     |     |     |     |    |       |       |       |       |      |   |      |     |        |   |       |
|-----------|-------|-----------------------|-------------------|-----|-----|-----|-----|----|-------|-------|-------|-------|------|---|------|-----|--------|---|-------|
| 2019-nCoV | 5172  | 5392 r1_1.6.1348088   | GENE_ID=r1;Pool=2 | 220 | 164 | 12  | 10  | 1  | 6177  | 5411  | 216   | 75    | 0    | 0 | 0    | 3   | 10652  | 0 | 4     |
| 2019-nCoV | 5325  | 5544 r1_1.6.704567    | GENE_ID=r1;Pool=1 | 219 | 32  | 72  | 17  | 1  | 5667  | 3363  | 28    | 7     | 1    | 0 | 0    | 0   | 3806   | 0 | 7     |
| 2019-nCoV | 5449  | 5670 r1_1.6.1074586   | GENE_ID=r1;Pool=2 | 221 | 102 | 37  | 31  | 3  | 8181  | 7387  | 28    | 16    | 0    | 0 | 0    | 0   | 3720   | 0 | 1     |
| 2019-nCoV | 5587  | 5810 r1_1.6.888565    | GENE_ID=r1;Pool=1 | 223 | 91  | 70  | 57  | 5  | 19936 | 12470 | 975   | 135   | 25   | 0 | 0    | 4   | 55311  | 0 | 13    |
| 2019-nCoV | 5717  | 5932 r1_1.6.611150    | GENE_ID=r1;Pool=2 | 215 | 133 | 131 | 21  | 1  | 7807  | 7343  | 32    | 12    | 0    | 0 | 0    | 1   | 7264   | 0 | 3     |
| 2019-nCoV | 5857  | 6073 r1_1.7.768310    | GENE_ID=r1;Pool=1 | 216 | 27  | 113 | 44  | 5  | 13311 | 9237  | 0     | 1     | 1    | 0 | 0    | 0   | 1123   | 0 | 25    |
| 2019-nCoV | 6027  | 6247 r1_1.7.1089264   | GENE_ID=r1;Pool=2 | 220 | 375 | 157 | 11  | 1  | 5091  | 6238  | 17    | 7     | 2    | 0 | 0    | 0   | 2190   | 0 | 2     |
| 2019-nCoV | 6124  | 6338 r1_1.7.82385     | GENE_ID=r1;Pool=1 | 214 | 47  | 122 | 58  | 1  | 13194 | 9609  | 148   | 21    | 5    | 0 | 0    | 2   | 21229  | 0 | 38    |
| 2019-nCoV | 6293  | 6512 r1_1.7.488632    | GENE_ID=r1;Pool=2 | 219 | 232 | 71  | 15  | 1  | 6036  | 6756  | 105   | 36    | 6    | 0 | 0    | 2   | 14717  | 0 | 4     |
| 2019-nCoV | 6380  | 6607 r1_1.7.210875    | GENE_ID=r1;Pool=1 | 227 | 154 | 128 | 63  | 0  | 17760 | 10434 | 48    | 11    | 1    | 0 | 0    | 0   | 11198  | 0 | 63    |
| 2019-nCoV | 6566  | 6728 r1_1.7.424978    | GENE_ID=r1;Pool=2 | 162 | 404 | 131 | 37  | 4  | 16474 | 13411 | 23168 | 2632  | 226  | 0 | 9    | 11  | 130622 | 0 | 92    |
| 2019-nCoV | 6650  | 6829 r1_1.7.507443    | GENE_ID=r1;Pool=1 | 179 | 148 | 184 | 132 | 1  | 39438 | 19536 | 36458 | 2107  | 0    | 0 | 0    | 6   | 213803 | 0 | 104   |
| 2019-nCoV | 6804  | 7017 r1_1.8.592180    | GENE_ID=r1;Pool=2 | 213 | 290 | 181 | 2   | 2  | 2179  | 2552  | 0     | 0     | 0    | 0 | 0    | 0   | 36     | 0 | 0     |
| 2019-nCoV | 6883  | 7099 r1_1.8.440758    | GENE_ID=r1;Pool=1 | 216 | 23  | 116 | 39  | 0  | 3586  | 2596  | 2     | 0     | 0    | 0 | 0    | 0   | 329    | 0 | 21    |
| 2019-nCoV | 7062  | 7283 r1_1.8.577570    | GENE_ID=r1;Pool=2 | 221 | 153 | 72  | 7   | 4  | 3207  | 2925  | 4     | 4     | 1    | 0 | 0    | 0   | 851    | 0 | 5     |
| 2019-nCoV | 7149  | 7360 r1_1.8.816048    | GENE_ID=r1;Pool=1 | 211 | 28  | 84  | 34  | 1  | 4191  | 3068  | 0     | 0     | 0    | 0 | 0    | 0   | 110    | 0 | 2     |
| 2019-nCoV | 7332  | 7551 r1_1.8.571466    | GENE_ID=r1;Pool=2 | 219 | 243 | 180 | 15  | 2  | 6345  | 5904  | 33    | 10    | 0    | 0 | 0    | 1   | 3527   | 0 | 0     |
| 2019-nCoV | 7426  | 7641 r1_1.8.889898    | GENE_ID=r1;Pool=1 | 215 | 43  | 154 | 101 | 4  | 13103 | 8243  | 242   | 60    | 9    | 0 | 0    | 3   | 17698  | 0 | 26    |
| 2019-nCoV | 7599  | 7754 r1_1.8.917351    | GENE_ID=r1;Pool=2 | 155 | 487 | 296 | 25  | 1  | 14702 | 404   | 88818 | 607   | 122  | 0 | 63   | 13  | 150590 | 0 | 368   |
| 2019-nCoV | 7687  | 7914 r1_1.8.546560    | GENE_ID=r1;Pool=1 | 227 | 54  | 86  | 63  | 0  | 16346 | 9788  | 59    | 5     | 0    | 0 | 0    | 0   | 11292  | 0 | 42    |
| 2019-nCoV | 7812  | 8021 r1_1.9.115540    | GENE_ID=r1;Pool=2 | 209 | 321 | 182 | 16  | 2  | 9269  | 8756  | 382   | 76    | 6    | 0 | 0    | 5   | 28116  | 0 | 2     |
| 2019-nCoV | 7954  | 8157 r1_1.9.1155524   | GENE_ID=r1;Pool=1 | 203 | 69  | 113 | 123 | 21 | 38268 | 16496 | 15437 | 1033  | 38   | 0 | 0    | 11  | 114900 | 0 | 23    |
| 2019-nCoV | 8099  | 8323 r1_1.9.225893    | GENE_ID=r1;Pool=2 | 224 | 448 | 237 | 33  | 0  | 11331 | 9951  | 152   | 46    | 3    | 0 | 0    | 5   | 21517  | 0 | 2     |
| 2019-nCoV | 8203  | 8420 r1_1.9.878128    | GENE_ID=r1;Pool=1 | 217 | 42  | 108 | 77  | 7  | 22382 | 11692 | 800   | 159   | 8    | 0 | 0    | 4   | 59895  | 0 | 21    |
| 2019-nCoV | 8364  | 8489 r1_1.9.1418747   | GENE_ID=r1;Pool=2 | 125 | 355 | 320 | 62  | 7  | 25810 | 16948 | 50034 | 14256 | 477  | 2 | 1070 | 183 | 78882  | 0 | 18033 |
| 2019-nCoV | 8464  | 8689 r1_1.9.603390    | GENE_ID=r1;Pool=1 | 225 | 62  | 83  | 65  | 1  | 9619  | 6455  | 26    | 9     | 1    | 0 | 0    | 2   | 5953   | 0 | 29    |
| 2019-nCoV | 8551  | 8760 r1_1.9.1307513   | GENE_ID=r1;Pool=2 | 209 | 200 | 142 | 11  | 0  | 2428  | 2902  | 37    | 15    | 2    | 0 | 0    | 1   | 2691   | 0 | 0     |
| 2019-nCoV | 8733  | 8874 r1_1.9.979743    | GENE_ID=r1;Pool=1 | 141 | 24  | 40  | 31  | 3  | 11392 | 4460  | 25846 | 10178 | 1126 | 0 | 24   | 15  | 65095  | 0 | 39    |
| 2019-nCoV | 8801  | 9004 r1_1.10.1203357  | GENE_ID=r1;Pool=2 | 203 | 183 | 105 | 10  | 1  | 6402  | 5303  | 225   | 59    | 4    | 0 | 0    | 0   | 1666   | 0 | 3     |
| 2019-nCoV | 8914  | 9131 r1_1.10.656311   | GENE_ID=r1;Pool=1 | 217 | 70  | 68  | 49  | 1  | 8415  | 4452  | 380   | 105   | 18   | 0 | 0    | 0   | 21530  | 0 | 15    |
| 2019-nCoV | 9055  | 9198 r1_1.10.1313109  | GENE_ID=r1;Pool=2 | 143 | 515 | 309 | 79  | 11 | 28935 | 20853 | 60940 | 7802  | 1186 | 0 | 135  | 32  | 126361 | 0 | 1992  |
| 2019-nCoV | 9179  | 9390 r1_1.10.67083    | GENE_ID=r1;Pool=1 | 211 | 17  | 98  | 33  | 1  | 3746  | 2479  | 47    | 16    | 1    | 0 | 0    | 1   | 2496   | 0 | 10    |
| 2019-nCoV | 9252  | 9476 r1_1.10.577417   | GENE_ID=r1;Pool=2 | 224 | 323 | 169 | 22  | 0  | 10418 | 9150  | 380   | 98    | 21   | 0 | 0    | 0   | 29760  | 0 | 2     |
| 2019-nCoV | 9432  | 9643 r1_1.10.711902   | GENE_ID=r1;Pool=1 | 211 | 141 | 148 | 92  | 1  | 27192 | 15041 | 812   | 157   | 20   | 0 | 0    | 4   | 65465  | 0 | 45    |
| 2019-nCoV | 9562  | 9780 r1_1.10.1150558  | GENE_ID=r1;Pool=2 | 218 | 264 | 129 | 4   | 0  | 1596  | 1363  | 0     | 0     | 0    | 0 | 0    | 0   | 276    | 0 | 2     |
| 2019-nCoV | 9687  | 9905 r1_1.10.1004139  | GENE_ID=r1;Pool=1 | 218 | 37  | 141 | 64  | 3  | 7934  | 5627  | 45    | 4     | 1    | 0 | 0    | 2   | 5062   | 0 | 32    |
| 2019-nCoV | 9857  | 10071 r1_1.11.376074  | GENE_ID=r1;Pool=2 | 214 | 290 | 132 | 45  | 0  | 18114 | 14783 | 1902  | 350   | 61   | 0 | 0    | 2   | 48244  | 0 | 4     |
| 2019-nCoV | 9953  | 10152 r1_1.11.1329692 | GENE_ID=r1;Pool=1 | 199 | 49  | 99  | 98  | 4  | 30275 | 14522 | 5458  | 559   | 124  | 0 | 0    | 7   | 84740  | 0 | 17    |
| 2019-nCoV | 10115 | 10330 r1_1.11.13382   | GENE_ID=r1;Pool=2 | 215 | 434 | 105 | 27  | 7  | 12912 | 11233 | 3672  | 521   | 112  | 0 | 0    | 12  | 79624  | 0 | 7     |
| 2019-nCoV | 10193 | 10414 r1_1.11.427711  | GENE_ID=r1;Pool=1 | 221 | 57  | 92  | 48  | 2  | 12963 | 8430  | 393   | 40    | 17   | 0 | 0    | 12  | 35865  | 0 | 20    |
| 2019-nCoV | 10379 | 10602 r1_1.11.73125   | GENE_ID=r1;Pool=2 | 223 | 239 | 175 | 18  | 1  | 9912  | 9992  | 127   | 32    | 9    | 0 | 0    | 1   | 16349  | 0 | 0     |
| 2019-nCoV | 10453 | 10679 r1_1.11.528369  | GENE_ID=r1;Pool=1 | 226 | 56  | 68  | 29  | 1  | 7910  | 4527  | 295   | 76    | 3    | 0 | 0    | 3   | 15044  | 0 | 3     |
| 2019-nCoV | 10656 | 10869 r1_1.11.475554  | GENE_ID=r1;Pool=2 | 213 | 272 | 187 | 39  | 5  | 15633 | 12015 | 528   | 190   | 13   | 0 | 0    | 5   | 30152  | 0 | 4     |

IonXpress\_033\_cov\_test4

|           |       |                       |                   |     |     |      |     |    |       |       |        |       |       |      |       |        |        |   |       |
|-----------|-------|-----------------------|-------------------|-----|-----|------|-----|----|-------|-------|--------|-------|-------|------|-------|--------|--------|---|-------|
| 2019-nCoV | 10719 | 10947 r1_1.11.868914  | GENE_ID=r1;Pool=1 | 228 | 88  | 163  | 106 | 3  | 25073 | 15001 | 2580   | 242   | 16    | 0    | 0     | 12     | 125565 | 0 | 58    |
| 2019-nCoV | 10914 | 11107 r1_1.12.680110  | GENE_ID=r1;Pool=2 | 193 | 265 | 199  | 19  | 2  | 7620  | 7345  | 274    | 91    | 3     | 0    | 0     | 1      | 13955  | 0 | 3     |
| 2019-nCoV | 10993 | 11218 r1_1.12.1126179 | GENE_ID=r1;Pool=1 | 225 | 32  | 130  | 37  | 2  | 3801  | 3408  | 2      | 0     | 0     | 0    | 0     | 2      | 223    | 0 | 29    |
| 2019-nCoV | 11153 | 11365 r1_1.12.896470  | GENE_ID=r1;Pool=2 | 212 | 411 | 138  | 24  | 6  | 11150 | 9755  | 347    | 163   | 3     | 0    | 0     | 4      | 22673  | 0 | 11    |
| 2019-nCoV | 11260 | 11477 r1_1.12.539895  | GENE_ID=r1;Pool=1 | 217 | 57  | 135  | 106 | 6  | 21288 | 12389 | 1448   | 262   | 17    | 0    | 0     | 4      | 60073  | 0 | 18    |
| 2019-nCoV | 11411 | 11633 r1_1.12.253973  | GENE_ID=r1;Pool=2 | 222 | 171 | 145  | 0   | 0  | 134   | 3096  | 0      | 4     | 0     | 0    | 0     | 0      | 887    | 0 | 2     |
| 2019-nCoV | 11523 | 11730 r1_1.12.1117806 | GENE_ID=r1;Pool=1 | 207 | 65  | 124  | 40  | 2  | 5186  | 4107  | 37     | 8     | 1     | 0    | 0     | 0      | 3250   | 0 | 29    |
| 2019-nCoV | 11685 | 11908 r1_1.12.153767  | GENE_ID=r1;Pool=2 | 223 | 546 | 253  | 31  | 0  | 21536 | 18782 | 1351   | 478   | 23    | 0    | 0     | 0      | 82717  | 0 | 10    |
| 2019-nCoV | 11772 | 11996 r1_1.13.246636  | GENE_ID=r1;Pool=1 | 224 | 74  | 141  | 122 | 11 | 23799 | 14597 | 1033   | 211   | 22    | 0    | 0     | 6      | 76289  | 0 | 67    |
| 2019-nCoV | 11952 | 12167 r1_1.13.1058977 | GENE_ID=r1;Pool=2 | 215 | 169 | 141  | 42  | 1  | 12678 | 8242  | 152    | 73    | 2     | 0    | 0     | 5      | 14603  | 0 | 5     |
| 2019-nCoV | 12049 | 12259 r1_1.13.441132  | GENE_ID=r1;Pool=1 | 210 | 56  | 102  | 101 | 11 | 30562 | 13158 | 2069   | 350   | 43    | 0    | 0     | 5      | 52453  | 0 | 20    |
| 2019-nCoV | 12227 | 12446 r1_1.13.113958  | GENE_ID=r1;Pool=2 | 219 | 379 | 194  | 46  | 8  | 19822 | 13966 | 3338   | 789   | 49    | 0    | 0     | 8      | 86574  | 0 | 5     |
| 2019-nCoV | 12300 | 12519 r1_1.13.1063824 | GENE_ID=r1;Pool=1 | 219 | 89  | 132  | 132 | 17 | 27713 | 13602 | 1224   | 164   | 26    | 0    | 0     | 8      | 86446  | 0 | 28    |
| 2019-nCoV | 12491 | 12710 r1_1.13.309544  | GENE_ID=r1;Pool=2 | 219 | 384 | 181  | 58  | 8  | 20717 | 14354 | 3827   | 776   | 32    | 0    | 0     | 5      | 51200  | 0 | 2     |
| 2019-nCoV | 12563 | 12790 r1_1.13.620498  | GENE_ID=r1;Pool=1 | 227 | 102 | 189  | 106 | 1  | 23014 | 11935 | 2440   | 461   | 63    | 0    | 0     | 2      | 95498  | 0 | 44    |
| 2019-nCoV | 12773 | 12998 r1_1.14.644822  | GENE_ID=r1;Pool=2 | 225 | 266 | 134  | 11  | 2  | 7379  | 6332  | 1187   | 333   | 17    | 0    | 0     | 6      | 35444  | 0 | 1     |
| 2019-nCoV | 12834 | 13054 r1_1.14.645992  | GENE_ID=r1;Pool=1 | 220 | 31  | 123  | 64  | 3  | 10026 | 5831  | 217    | 42    | 13    | 0    | 0     | 4      | 18491  | 0 | 23    |
| 2019-nCoV | 13038 | 13232 r1_1.14.1033969 | GENE_ID=r1;Pool=2 | 194 | 194 | 102  | 42  | 3  | 20031 | 11296 | 37007  | 18099 | 460   | 0    | 3     | 2      | 36413  | 0 | 18    |
| 2019-nCoV | 13105 | 13321 r1_1.14.1180964 | GENE_ID=r1;Pool=1 | 216 | 238 | 157  | 154 | 20 | 48345 | 20230 | 40640  | 3013  | 499   | 0    | 0     | 15     | 226898 | 0 | 72    |
| 2019-nCoV | 13285 | 13509 r1_1.14.1300871 | GENE_ID=r1;Pool=2 | 224 | 311 | 184  | 26  | 0  | 7364  | 6955  | 546    | 214   | 4     | 0    | 0     | 4      | 25179  | 0 | 2     |
| 2019-nCoV | 13362 | 13440 ORF1ab          | GENE_ID=r1;Pool=1 | 78  | 429 | 1247 | 420 | 3  | 27854 | 12984 | 133732 | 83569 | 16714 | 4614 | 75544 | 215233 | 85576  | 0 | 90653 |
| 2019-nCoV | 13484 | 13705 r1_1.14.1350355 | GENE_ID=r1;Pool=1 | 221 | 40  | 98   | 29  | 2  | 7908  | 3986  | 53     | 8     | 0     | 0    | 0     | 3      | 6855   | 0 | 6     |
| 2019-nCoV | 13549 | 13772 r1_1.14.710429  | GENE_ID=r1;Pool=2 | 223 | 251 | 131  | 22  | 3  | 11428 | 10711 | 20     | 17    | 0     | 0    | 0     | 0      | 6517   | 0 | 1     |
| 2019-nCoV | 13751 | 13965 r1_1.14.786182  | GENE_ID=r1;Pool=1 | 214 | 25  | 129  | 32  | 1  | 10360 | 7645  | 43     | 5     | 1     | 0    | 0     | 0      | 7272   | 0 | 10    |
| 2019-nCoV | 13819 | 14036 r1_1.15.645156  | GENE_ID=r1;Pool=2 | 217 | 468 | 165  | 37  | 4  | 12673 | 12217 | 175    | 53    | 5     | 0    | 0     | 0      | 25974  | 0 | 3     |
| 2019-nCoV | 14001 | 14206 r1_1.15.214861  | GENE_ID=r1;Pool=1 | 205 | 100 | 149  | 94  | 7  | 29335 | 18222 | 7617   | 789   | 93    | 0    | 5     | 5      | 104403 | 0 | 24    |
| 2019-nCoV | 14099 | 14319 r1_1.15.382294  | GENE_ID=r1;Pool=2 | 220 | 400 | 138  | 31  | 3  | 11669 | 12889 | 170    | 41    | 2     | 0    | 0     | 2      | 33700  | 0 | 5     |
| 2019-nCoV | 14252 | 14472 r1_1.15.464755  | GENE_ID=r1;Pool=1 | 220 | 49  | 105  | 77  | 0  | 5915  | 5399  | 11     | 2     | 0     | 0    | 0     | 0      | 1032   | 0 | 17    |
| 2019-nCoV | 14410 | 14550 r1_1.15.1421280 | GENE_ID=r1;Pool=2 | 140 | 364 | 315  | 1   | 2  | 72    | 93    | 0      | 0     | 0     | 0    | 0     | 3      | 163628 | 0 | 10    |
| 2019-nCoV | 14515 | 14728 r1_1.15.301591  | GENE_ID=r1;Pool=1 | 213 | 64  | 147  | 93  | 0  | 17773 | 10318 | 365    | 64    | 4     | 0    | 0     | 2      | 31475  | 0 | 40    |
| 2019-nCoV | 14649 | 14875 r1_1.15.917374  | GENE_ID=r1;Pool=2 | 226 | 249 | 181  | 5   | 1  | 3654  | 4795  | 5      | 3     | 0     | 0    | 0     | 0      | 760    | 0 | 1     |
| 2019-nCoV | 14777 | 15005 r1_1.16.154530  | GENE_ID=r1;Pool=1 | 228 | 40  | 69   | 60  | 3  | 12716 | 7182  | 635    | 114   | 6     | 0    | 0     | 3      | 49459  | 0 | 15    |
| 2019-nCoV | 14917 | 15092 r1_1.16.401810  | GENE_ID=r1;Pool=2 | 175 | 527 | 300  | 148 | 17 | 61048 | 36549 | 112384 | 18412 | 1205  | 0    | 32    | 12     | 184202 | 0 | 209   |
| 2019-nCoV | 15049 | 15264 r1_1.16.1460073 | GENE_ID=r1;Pool=1 | 215 | 69  | 156  | 91  | 6  | 21317 | 12734 | 1493   | 159   | 11    | 0    | 0     | 7      | 57090  | 0 | 35    |
| 2019-nCoV | 15133 | 15347 r1_1.16.634891  | GENE_ID=r1;Pool=2 | 214 | 231 | 185  | 16  | 6  | 6284  | 4095  | 1015   | 234   | 3     | 0    | 0     | 12     | 29952  | 0 | 4     |
| 2019-nCoV | 15308 | 15521 r1_1.16.393748  | GENE_ID=r1;Pool=1 | 213 | 157 | 147  | 70  | 4  | 22484 | 13492 | 21316  | 1759  | 421   | 0    | 0     | 28     | 121239 | 0 | 37    |
| 2019-nCoV | 15387 | 15582 r1_1.16.534874  | GENE_ID=r1;Pool=2 | 195 | 518 | 221  | 57  | 0  | 21474 | 16143 | 6120   | 1068  | 34    | 0    | 0     | 5      | 131152 | 0 | 28    |
| 2019-nCoV | 15560 | 15741 r1_1.16.1212393 | GENE_ID=r1;Pool=1 | 181 | 170 | 145  | 96  | 1  | 27783 | 13608 | 49641  | 9701  | 552   | 0    | 0     | 4      | 94036  | 0 | 21    |
| 2019-nCoV | 15625 | 15845 r1_1.16.1001247 | GENE_ID=r1;Pool=2 | 220 | 264 | 139  | 35  | 0  | 18705 | 13842 | 30     | 14    | 0     | 0    | 0     | 0      | 6749   | 0 | 3     |
| 2019-nCoV | 15781 | 15999 r1_1.17.437100  | GENE_ID=r1;Pool=1 | 218 | 18  | 61   | 15  | 3  | 6800  | 4009  | 77     | 20    | 0     | 0    | 0     | 2      | 8197   | 0 | 15    |
| 2019-nCoV | 15891 | 16064 r1_1.17.167020  | GENE_ID=r1;Pool=2 | 173 | 343 | 246  | 50  | 2  | 18373 | 14227 | 39708  | 6784  | 163   | 0    | 8     | 7      | 77369  | 0 | 86    |
| 2019-nCoV | 16044 | 16266 r1_1.17.985305  | GENE_ID=r1;Pool=1 | 222 | 111 | 143  | 89  | 9  | 30395 | 15384 | 5896   | 851   | 22    | 0    | 0     | 9      | 103297 | 0 | 36    |
| 2019-nCoV | 16131 | 16307 r1_1.17.59033   | GENE_ID=r1;Pool=2 | 176 | 291 | 219  | 41  | 5  | 16518 | 12521 | 24636  | 4145  | 0     | 0    | 1     | 9      | 58357  | 0 | 23    |

IonXpress\_033\_cov\_test4

|           |       |                       |                   |     |     |      |     |    |       |       |        |       |      |      |       |        |        |   |        |
|-----------|-------|-----------------------|-------------------|-----|-----|------|-----|----|-------|-------|--------|-------|------|------|-------|--------|--------|---|--------|
| 2019-nCoV | 16305 | 16466 r1_1.17.908303  | GENE_ID=r1;Pool=1 | 161 | 455 | 294  | 252 | 17 | 83837 | 34676 | 212367 | 43033 | 3560 | 1    | 53    | 19     | 285792 | 0 | 162    |
| 2019-nCoV | 16355 | 16572 r1_1.17.179508  | GENE_ID=r1;Pool=2 | 217 | 436 | 221  | 23  | 2  | 12036 | 10865 | 319    | 52    | 0    | 0    | 0     | 0      | 27151  | 0 | 7      |
| 2019-nCoV | 16508 | 16733 r1_1.17.1330160 | GENE_ID=r1;Pool=1 | 225 | 102 | 197  | 63  | 3  | 23245 | 14295 | 692    | 117   | 11   | 0    | 0     | 3      | 64228  | 0 | 36     |
| 2019-nCoV | 16625 | 16837 r1_1.17.1475704 | GENE_ID=r1;Pool=2 | 212 | 410 | 202  | 25  | 1  | 7914  | 8406  | 140    | 36    | 2    | 0    | 0     | 0      | 25162  | 0 | 3      |
| 2019-nCoV | 16772 | 16993 r1_1.18.626357  | GENE_ID=r1;Pool=1 | 221 | 38  | 84   | 46  | 0  | 11567 | 7771  | 294    | 53    | 0    | 0    | 0     | 2      | 26714  | 0 | 8      |
| 2019-nCoV | 16879 | 17092 r1_1.18.844898  | GENE_ID=r1;Pool=2 | 213 | 583 | 259  | 67  | 17 | 20184 | 16007 | 3228   | 537   | 0    | 0    | 0     | 8      | 81467  | 0 | 6      |
| 2019-nCoV | 17039 | 17226 r1_1.18.526704  | GENE_ID=r1;Pool=1 | 187 | 77  | 69   | 93  | 9  | 27670 | 14237 | 10692  | 1021  | 56   | 0    | 0     | 7      | 66822  | 0 | 43     |
| 2019-nCoV | 17135 | 17327 r1_1.18.690305  | GENE_ID=r1;Pool=2 | 192 | 547 | 316  | 54  | 5  | 17014 | 14771 | 47908  | 6904  | 522  | 0    | 5     | 22     | 170002 | 0 | 35     |
| 2019-nCoV | 17264 | 17455 r1_1.18.497449  | GENE_ID=r1;Pool=1 | 191 | 187 | 84   | 142 | 6  | 74198 | 33565 | 87436  | 8969  | 1379 | 1    | 1     | 132    | 221753 | 0 | 67     |
| 2019-nCoV | 17377 | 17583 r1_1.18.1038608 | GENE_ID=r1;Pool=2 | 206 | 407 | 183  | 47  | 1  | 23536 | 18061 | 6994   | 887   | 13   | 0    | 0     | 89     | 146166 | 0 | 20     |
| 2019-nCoV | 17495 | 17712 r1_1.18.1119721 | GENE_ID=r1;Pool=1 | 217 | 45  | 81   | 64  | 8  | 20378 | 13629 | 512    | 81    | 12   | 0    | 0     | 6      | 70657  | 0 | 39     |
| 2019-nCoV | 17647 | 17863 r1_1.18.18784   | GENE_ID=r1;Pool=2 | 216 | 300 | 201  | 13  | 1  | 7512  | 7849  | 68     | 14    | 2    | 0    | 0     | 0      | 20487  | 0 | 4      |
| 2019-nCoV | 17753 | 17975 r1_1.19.1526676 | GENE_ID=r1;Pool=1 | 222 | 31  | 94   | 39  | 3  | 12277 | 7335  | 231    | 36    | 0    | 0    | 0     | 0      | 3      | 0 | 21     |
| 2019-nCoV | 17911 | 18110 r1_1.19.265387  | GENE_ID=r1;Pool=2 | 199 | 304 | 185  | 21  | 5  | 7489  | 6453  | 482    | 68    | 17   | 0    | 0     | 3      | 23094  | 0 | 11     |
| 2019-nCoV | 18025 | 18246 r1_1.19.505985  | GENE_ID=r1;Pool=1 | 221 | 56  | 105  | 68  | 5  | 18726 | 10162 | 1796   | 155   | 0    | 0    | 0     | 9      | 54174  | 0 | 17     |
| 2019-nCoV | 18167 | 18389 r1_1.19.16612   | GENE_ID=r1;Pool=2 | 222 | 181 | 148  | 11  | 0  | 4157  | 4045  | 173    | 38    | 0    | 0    | 0     | 1      | 10164  | 0 | 6      |
| 2019-nCoV | 18288 | 18488 r1_1.19.647510  | GENE_ID=r1;Pool=1 | 200 | 80  | 150  | 99  | 8  | 20247 | 9616  | 6858   | 677   | 46   | 0    | 0     | 8      | 87864  | 0 | 20     |
| 2019-nCoV | 18458 | 18669 r1_1.19.574748  | GENE_ID=r1;Pool=2 | 211 | 218 | 175  | 17  | 1  | 7275  | 6817  | 1221   | 178   | 33   | 0    | 0     | 2      | 29121  | 0 | 4      |
| 2019-nCoV | 18528 | 18750 r1_1.19.283459  | GENE_ID=r1;Pool=1 | 222 | 20  | 92   | 28  | 0  | 3302  | 2296  | 24     | 8     | 0    | 0    | 0     | 0      | 2013   | 0 | 8      |
| 2019-nCoV | 18734 | 18886 r1_1.19.1258435 | GENE_ID=r1;Pool=2 | 152 | 319 | 240  | 18  | 0  | 8141  | 4935  | 9776   | 1088  | 110  | 0    | 32    | 20     | 40757  | 0 | 457    |
| 2019-nCoV | 18805 | 19008 r1_1.20.874613  | GENE_ID=r1;Pool=1 | 203 | 135 | 188  | 174 | 17 | 58660 | 26725 | 94105  | 5947  | 382  | 0    | 0     | 20     | 238403 | 0 | 79     |
| 2019-nCoV | 18927 | 19146 r1_1.20.64915   | GENE_ID=r1;Pool=2 | 219 | 440 | 176  | 46  | 4  | 15163 | 11133 | 2515   | 168   | 11   | 0    | 0     | 2      | 65112  | 0 | 10     |
| 2019-nCoV | 19049 | 19263 r1_1.20.1122238 | GENE_ID=r1;Pool=1 | 214 | 44  | 109  | 46  | 3  | 10388 | 5247  | 780    | 64    | 9    | 0    | 0     | 3      | 30069  | 0 | 8      |
| 2019-nCoV | 19193 | 19398 r1_1.20.102922  | GENE_ID=r1;Pool=2 | 205 | 200 | 127  | 10  | 1  | 5210  | 5156  | 150    | 45    | 1    | 0    | 0     | 2      | 10611  | 0 | 2      |
| 2019-nCoV | 19303 | 19526 r1_1.20.1321768 | GENE_ID=r1;Pool=1 | 223 | 24  | 55   | 34  | 2  | 5433  | 3087  | 110    | 8     | 0    | 0    | 0     | 0      | 9548   | 0 | 8      |
| 2019-nCoV | 19455 | 19673 r1_1.20.248649  | GENE_ID=r1;Pool=2 | 218 | 288 | 170  | 18  | 2  | 8898  | 7204  | 329    | 44    | 0    | 0    | 0     | 3      | 15759  | 0 | 1      |
| 2019-nCoV | 19579 | 19801 r1_1.20.840238  | GENE_ID=r1;Pool=1 | 222 | 27  | 81   | 49  | 5  | 10035 | 6019  | 56     | 9     | 1    | 0    | 0     | 1      | 6051   | 0 | 15     |
| 2019-nCoV | 19732 | 19957 r1_1.20.35460   | GENE_ID=r1;Pool=2 | 225 | 272 | 107  | 39  | 1  | 14560 | 11499 | 304    | 54    | 0    | 0    | 0     | 2      | 23645  | 0 | 5      |
| 2019-nCoV | 19847 | 20068 r1_1.21.493770  | GENE_ID=r1;Pool=1 | 221 | 46  | 66   | 75  | 5  | 24521 | 12097 | 2473   | 205   | 0    | 0    | 0     | 3      | 58196  | 0 | 32     |
| 2019-nCoV | 20012 | 20231 r1_1.21.1261696 | GENE_ID=r1;Pool=2 | 219 | 165 | 131  | 10  | 0  | 4608  | 5492  | 2      | 0     | 0    | 0    | 0     | 0      | 432    | 0 | 1      |
| 2019-nCoV | 20112 | 20332 r1_1.21.1013575 | GENE_ID=r1;Pool=1 | 220 | 39  | 165  | 67  | 2  | 11945 | 8566  | 18     | 5     | 0    | 0    | 0     | 0      | 3274   | 0 | 30     |
| 2019-nCoV | 20295 | 20456 r1_1.21.259925  | GENE_ID=r1;Pool=2 | 161 | 683 | 343  | 82  | 10 | 32903 | 26869 | 54143  | 4197  | 0    | 0    | 4     | 5      | 154629 | 0 | 117    |
| 2019-nCoV | 20380 | 20604 r1_1.21.272458  | GENE_ID=r1;Pool=1 | 224 | 100 | 79   | 102 | 14 | 25174 | 14931 | 21     | 2     | 1    | 0    | 0     | 1      | 3640   | 0 | 42     |
| 2019-nCoV | 20498 | 20683 r1_1.21.150746  | GENE_ID=r1;Pool=2 | 185 | 279 | 169  | 17  | 2  | 6193  | 6436  | 198    | 27    | 0    | 0    | 0     | 1      | 21140  | 0 | 5      |
| 2019-nCoV | 20649 | 20875 r1_1.21.1100292 | GENE_ID=r1;Pool=1 | 226 | 77  | 150  | 60  | 6  | 12368 | 7151  | 109    | 15    | 4    | 0    | 0     | 1      | 11887  | 0 | 15     |
| 2019-nCoV | 20763 | 20984 r1_1.22.467885  | GENE_ID=r1;Pool=2 | 221 | 239 | 115  | 15  | 0  | 4951  | 5013  | 31     | 18    | 0    | 0    | 0     | 0      | 4623   | 0 | 2      |
| 2019-nCoV | 20915 | 21142 r1_1.22.1003006 | GENE_ID=r1;Pool=1 | 227 | 145 | 141  | 63  | 2  | 18217 | 8619  | 1681   | 165   | 0    | 0    | 0     | 4      | 68717  | 0 | 28     |
| 2019-nCoV | 21031 | 21198 r1_1.22.648712  | GENE_ID=r1;Pool=2 | 167 | 381 | 339  | 60  | 5  | 23149 | 17680 | 26480  | 5374  | 79   | 0    | 2     | 5      | 68268  | 0 | 27     |
| 2019-nCoV | 21187 | 21255 r1_1.22.1029456 | GENE_ID=r1;Pool=1 | 68  | 832 | 3028 | 967 | 8  | 81705 | 32867 | 61558  | 24547 | 983  | 7383 | 49573 | 358931 | 86352  | 0 | 217747 |
| 2019-nCoV | 21246 | 21345 r1_1.22.423042  | GENE_ID=r1;Pool=2 | 99  | 670 | 1194 | 146 | 9  | 48575 | 29074 | 147499 | 69495 | 2779 | 134  | 12330 | 31907  | 114471 | 0 | 325867 |
| 2019-nCoV | 21309 | 21531 r1_1.22.906171  | GENE_ID=r1;Pool=1 | 222 | 44  | 91   | 33  | 0  | 10029 | 6227  | 45     | 7     | 0    | 0    | 0     | 0      | 7417   | 0 | 30     |
| 2019-nCoV | 21451 | 21664 r1_1.22.714732  | GENE_ID=r1;Pool=2 | 213 | 111 | 121  | 1   | 0  | 858   | 869   | 1      | 0     | 0    | 0    | 0     | 0      | 336    | 0 | 1      |
| 2019-nCoV | 21597 | 21802 r1_1.22.1087818 | GENE_ID=r1;Pool=1 | 205 | 48  | 119  | 8   | 1  | 6004  | 4240  | 90     | 13    | 2    | 0    | 0     | 0      | 9578   | 0 | 43     |

IonXpress\_033\_cov\_test4

|           |       |       |                 |                   |     |     |     |     |    |       |       |        |        |       |      |       |       |        |   |       |
|-----------|-------|-------|-----------------|-------------------|-----|-----|-----|-----|----|-------|-------|--------|--------|-------|------|-------|-------|--------|---|-------|
| 2019-nCoV | 21757 | 21973 | r1_1.23.127614  | GENE_ID=r1;Pool=2 | 216 | 396 | 212 | 12  | 0  | 5769  | 6263  | 55     | 9      | 0     | 0    | 0     | 0     | 6786   | 0 | 7     |
| 2019-nCoV | 21847 | 22058 | r1_1.23.86525   | GENE_ID=r1;Pool=1 | 211 | 41  | 180 | 54  | 0  | 12915 | 7638  | 53     | 11     | 4     | 0    | 0     | 1     | 6973   | 0 | 29    |
| 2019-nCoV | 22025 | 22192 | r1_1.23.335026  | GENE_ID=r1;Pool=2 | 167 | 350 | 290 | 11  | 0  | 8163  | 8124  | 750    | 101    | 0     | 0    | 0     | 0     | 28373  | 0 | 2     |
| 2019-nCoV | 22100 | 22319 | r1_1.23.934154  | GENE_ID=r1;Pool=1 | 219 | 34  | 68  | 18  | 1  | 2530  | 11324 | 10     | 10     | 1     | 0    | 0     | 1     | 10626  | 0 | 23    |
| 2019-nCoV | 22246 | 22446 | r1_1.23.1186794 | GENE_ID=r1;Pool=2 | 200 | 200 | 170 | 11  | 2  | 5870  | 6313  | 224    | 48     | 4     | 0    | 0     | 5     | 19615  | 0 | 4     |
| 2019-nCoV | 22368 | 22581 | r1_1.23.776338  | GENE_ID=r1;Pool=1 | 213 | 56  | 81  | 60  | 8  | 22353 | 12914 | 269    | 47     | 2     | 0    | 0     | 3     | 38966  | 0 | 24    |
| 2019-nCoV | 22494 | 22685 | r1_1.23.474025  | GENE_ID=r1;Pool=2 | 191 | 275 | 180 | 28  | 1  | 7224  | 7688  | 37     | 10     | 0     | 0    | 0     | 0     | 5328   | 0 | 2     |
| 2019-nCoV | 22623 | 22834 | r1_1.23.179592  | GENE_ID=r1;Pool=1 | 211 | 29  | 47  | 14  | 2  | 3953  | 2696  | 4      | 2      | 0     | 0    | 0     | 0     | 776    | 0 | 14    |
| 2019-nCoV | 22793 | 22967 | r1_1.23.281209  | GENE_ID=r1;Pool=2 | 174 | 544 | 321 | 44  | 0  | 28061 | 18788 | 12439  | 1090   | 105   | 0    | 0     | 2     | 101077 | 0 | 9     |
| 2019-nCoV | 22876 | 23048 | r1_1.24.908700  | GENE_ID=r1;Pool=1 | 172 | 166 | 198 | 176 | 4  | 70979 | 36651 | 17290  | 990    | 173   | 0    | 0     | 10    | 193259 | 0 | 92    |
| 2019-nCoV | 23008 | 23224 | r1_1.24.626090  | GENE_ID=r1;Pool=2 | 216 | 215 | 148 | 7   | 2  | 3848  | 4355  | 82     | 26     | 2     | 0    | 0     | 3     | 12472  | 0 | 0     |
| 2019-nCoV | 23089 | 23290 | r1_1.24.942468  | GENE_ID=r1;Pool=1 | 201 | 24  | 108 | 52  | 4  | 11335 | 6219  | 434    | 71     | 5     | 0    | 0     | 3     | 35006  | 0 | 12    |
| 2019-nCoV | 23269 | 23443 | r1_1.24.724995  | GENE_ID=r1;Pool=2 | 174 | 256 | 255 | 27  | 1  | 13884 | 9775  | 26232  | 4616   | 198   | 0    | 13    | 11    | 62696  | 0 | 49    |
| 2019-nCoV | 23335 | 23539 | r1_1.24.1247492 | GENE_ID=r1;Pool=1 | 204 | 64  | 154 | 69  | 5  | 11946 | 7505  | 962    | 67     | 0     | 0    | 0     | 8     | 66611  | 0 | 79    |
| 2019-nCoV | 23486 | 23642 | r1_1.24.1299670 | GENE_ID=r1;Pool=2 | 156 | 402 | 366 | 130 | 12 | 55055 | 28288 | 189810 | 90855  | 2136  | 4    | 1419  | 87    | 150853 | 0 | 5285  |
| 2019-nCoV | 23580 | 23724 | r1_1.24.394902  | GENE_ID=r1;Pool=1 | 144 | 154 | 206 | 198 | 30 | 50635 | 25070 | 237660 | 47487  | 8830  | 5    | 563   | 43    | 203622 | 0 | 201   |
| 2019-nCoV | 23683 | 23895 | r1_1.24.1444825 | GENE_ID=r1;Pool=2 | 212 | 349 | 127 | 22  | 1  | 8566  | 7181  | 222    | 50     | 0     | 0    | 0     | 2     | 27792  | 0 | 6     |
| 2019-nCoV | 23767 | 23978 | r1_1.25.238200  | GENE_ID=r1;Pool=1 | 211 | 26  | 44  | 14  | 1  | 3769  | 2397  | 11     | 9      | 0     | 0    | 0     | 1     | 1866   | 0 | 8     |
| 2019-nCoV | 23941 | 24106 | r1_1.25.388943  | GENE_ID=r1;Pool=2 | 165 | 199 | 102 | 28  | 4  | 10568 | 8747  | 2052   | 412    | 0     | 0    | 0     | 7     | 37215  | 0 | 20    |
| 2019-nCoV | 24021 | 24191 | r1_1.25.225351  | GENE_ID=r1;Pool=1 | 170 | 56  | 106 | 99  | 11 | 38827 | 18486 | 21567  | 2221   | 383   | 0    | 3     | 19    | 89829  | 0 | 39    |
| 2019-nCoV | 24148 | 24357 | r1_1.25.1650697 | GENE_ID=r1;Pool=2 | 209 | 266 | 181 | 24  | 2  | 11024 | 8943  | 1706   | 339    | 0     | 0    | 0     | 20    | 56785  | 0 | 4     |
| 2019-nCoV | 24229 | 24424 | r1_1.25.611375  | GENE_ID=r1;Pool=1 | 195 | 32  | 115 | 40  | 2  | 8999  | 5937  | 342    | 69     | 7     | 0    | 0     | 2     | 20225  | 0 | 13    |
| 2019-nCoV | 24412 | 24564 | r1_1.25.546336  | GENE_ID=r1;Pool=2 | 152 | 403 | 256 | 64  | 2  | 28764 | 19839 | 15275  | 3266   | 454   | 0    | 15    | 12    | 128484 | 0 | 200   |
| 2019-nCoV | 24465 | 24679 | r1_1.25.198255  | GENE_ID=r1;Pool=1 | 214 | 139 | 186 | 130 | 1  | 44473 | 21499 | 1029   | 202    | 15    | 0    | 0     | 3     | 14760  | 0 | 114   |
| 2019-nCoV | 24612 | 24806 | r1_1.25.1372620 | GENE_ID=r1;Pool=2 | 194 | 205 | 137 | 19  | 3  | 10187 | 8643  | 1966   | 416    | 38    | 0    | 0     | 4     | 42595  | 0 | 5     |
| 2019-nCoV | 24724 | 24943 | r1_1.25.1000367 | GENE_ID=r1;Pool=1 | 219 | 24  | 66  | 33  | 3  | 12589 | 6915  | 81     | 21     | 5     | 0    | 0     | 1     | 9770   | 0 | 16    |
| 2019-nCoV | 24850 | 25069 | r1_1.26.667712  | GENE_ID=r1;Pool=2 | 219 | 325 | 218 | 9   | 0  | 5791  | 6869  | 92     | 33     | 6     | 0    | 0     | 0     | 14430  | 0 | 8     |
| 2019-nCoV | 24990 | 25210 | r1_1.26.36177   | GENE_ID=r1;Pool=1 | 220 | 30  | 52  | 38  | 4  | 12858 | 7692  | 129    | 30     | 1     | 0    | 0     | 4     | 17494  | 0 | 5     |
| 2019-nCoV | 25122 | 25325 | r1_1.26.479275  | GENE_ID=r1;Pool=2 | 203 | 377 | 298 | 31  | 0  | 9909  | 8377  | 3237   | 632    | 48    | 0    | 0     | 6     | 57679  | 0 | 7     |
| 2019-nCoV | 25251 | 25477 | r1_1.26.628976  | GENE_ID=r1;Pool=1 | 226 | 18  | 59  | 30  | 3  | 6629  | 5186  | 77     | 15     | 1     | 0    | 0     | 2     | 9743   | 0 | 7     |
| 2019-nCoV | 25372 | 25566 | r1_1.26.781963  | GENE_ID=r1;Pool=2 | 194 | 438 | 245 | 57  | 4  | 20957 | 18448 | 5485   | 786    | 53    | 0    | 0     | 11    | 109356 | 0 | 9     |
| 2019-nCoV | 25512 | 25622 | r1_1.26.386064  | GENE_ID=r1;Pool=1 | 110 | 171 | 313 | 279 | 15 | 96980 | 43020 | 344181 | 201666 | 33501 | 1309 | 27109 | 11629 | 186479 | 0 | 14699 |
| 2019-nCoV | 25611 | 25797 | r1_1.26.370427  | GENE_ID=r1;Pool=2 | 186 | 270 | 120 | 19  | 0  | 7968  | 9027  | 1304   | 251    | 10    | 0    | 0     | 2     | 43585  | 0 | 8     |
| 2019-nCoV | 25666 | 25887 | r1_1.26.1209362 | GENE_ID=r1;Pool=1 | 221 | 50  | 108 | 26  | 2  | 5161  | 4069  | 48     | 15     | 0     | 0    | 0     | 3     | 6745   | 0 | 34    |
| 2019-nCoV | 25844 | 26044 | r1_1.27.773551  | GENE_ID=r1;Pool=2 | 200 | 246 | 128 | 11  | 0  | 4612  | 5371  | 1061   | 167    | 14    | 0    | 0     | 1     | 29219  | 0 | 9     |
| 2019-nCoV | 25930 | 26131 | r1_1.27.931264  | GENE_ID=r1;Pool=1 | 201 | 50  | 16  | 61  | 0  | 22891 | 15073 | 8583   | 881    | 123   | 0    | 2     | 0     | 49074  | 0 | 15    |
| 2019-nCoV | 26089 | 26307 | r1_1.27.887996  | GENE_ID=r1;Pool=2 | 218 | 477 | 279 | 19  | 5  | 8145  | 10727 | 589    | 137    | 18    | 0    | 0     | 7     | 48969  | 0 | 116   |
| 2019-nCoV | 26168 | 26351 | r1_1.27.1361854 | GENE_ID=r1;Pool=1 | 183 | 134 | 150 | 155 | 4  | 30563 | 22210 | 81540  | 5346   | 588   | 1    | 0     | 16    | 332292 | 0 | 130   |
| 2019-nCoV | 26351 | 26540 | r1_1.27.1073732 | GENE_ID=r1;Pool=2 | 189 | 144 | 107 | 11  | 0  | 2315  | 3255  | 11     | 11     | 1     | 0    | 0     | 1     | 2749   | 0 | 1     |
| 2019-nCoV | 26389 | 26605 | r1_1.27.793950  | GENE_ID=r1;Pool=1 | 216 | 19  | 80  | 30  | 2  | 5393  | 5063  | 1      | 3      | 0     | 0    | 0     | 0     | 725    | 0 | 7     |
| 2019-nCoV | 26588 | 26800 | r1_1.27.993816  | GENE_ID=r1;Pool=2 | 212 | 173 | 120 | 12  | 0  | 4352  | 5732  | 7      | 6      | 0     | 0    | 0     | 0     | 2799   | 0 | 1     |
| 2019-nCoV | 26651 | 26847 | r1_1.27.410513  | GENE_ID=r1;Pool=1 | 196 | 27  | 111 | 65  | 2  | 12587 | 10239 | 233    | 66     | 45    | 0    | 0     | 9     | 23800  | 0 | 26    |
| 2019-nCoV | 26839 | 27032 | r1_1.28.1318360 | GENE_ID=r1;Pool=2 | 193 | 277 | 256 | 28  | 3  | 7830  | 7043  | 16722  | 2977   | 320   | 0    | 7     | 30    | 76714  | 0 | 67    |

IonXpress\_033\_cov\_test4

|           |       |                        |                                                                                                              |       |         |        |      |         |         |         |         |        |         |         |         |          |        |         |        |
|-----------|-------|------------------------|--------------------------------------------------------------------------------------------------------------|-------|---------|--------|------|---------|---------|---------|---------|--------|---------|---------|---------|----------|--------|---------|--------|
| 2019-nCoV | 26891 | 27096 r1_1.28.162880   | GENE_ID=r1;Pool=1                                                                                            | 205   | 33      | 96     | 36   | 0       | 4293    | 2788    | 471     | 103    | 5       | 0       | 0       | 11       | 16734  | 0       | 26     |
| 2019-nCoV | 27076 | 27184 r1_1.28.609057   | GENE_ID=r1;Pool=2                                                                                            | 108   | 865     | 1252   | 59   | 0       | 14734   | 12005   | 69375   | 15797  | 277     | 20      | 2590    | 21515    | 157027 | 0       | 221036 |
| 2019-nCoV | 27133 | 27349 r1_1.28.888265   | GENE_ID=r1;Pool=1                                                                                            | 216   | 79      | 194    | 177  | 13      | 24128   | 24028   | 63      | 12     | 4       | 0       | 0       | 3        | 15038  | 0       | 69     |
| 2019-nCoV | 27232 | 27453 r1_1.28.1321347  | GENE_ID=r1;Pool=2                                                                                            | 221   | 322     | 318    | 15   | 6       | 4941    | 7638    | 6       | 2      | 0       | 0       | 0       | 1        | 1125   | 0       | 16     |
| 2019-nCoV | 27396 | 27596 r1_1.28.126379   | GENE_ID=r1;Pool=1                                                                                            | 200   | 85      | 140    | 148  | 1       | 28201   | 21590   | 1771    | 167    | 26      | 0       | 0       | 28       | 77684  | 0       | 49     |
| 2019-nCoV | 27499 | 27701 r1_1.28.99230    | GENE_ID=r1;Pool=2                                                                                            | 202   | 281     | 269    | 8    | 0       | 4996    | 7658    | 56      | 13     | 4       | 0       | 0       | 1        | 5801   | 0       | 5      |
| 2019-nCoV | 27635 | 27854 r1_1.28.529924   | GENE_ID=r1;Pool=1                                                                                            | 219   | 33      | 82     | 50   | 1       | 10330   | 9282    | 3       | 1      | 0       | 0       | 0       | 1        | 800    | 0       | 12     |
| 2019-nCoV | 27749 | 27918 r1_1.28.958844   | GENE_ID=r1;Pool=2                                                                                            | 169   | 373     | 368    | 36   | 0       | 16673   | 21808   | 1038    | 156    | 10      | 0       | 0       | 4        | 43176  | 0       | 18     |
| 2019-nCoV | 27896 | 28083 r1_1.29.1311557  | GENE_ID=r1;Pool=1                                                                                            | 187   | 157     | 162    | 123  | 11      | 35133   | 32610   | 53449   | 3870   | 1878    | 0       | 0       | 42       | 154110 | 0       | 56     |
| 2019-nCoV | 27963 | 28186 r1_1.29.791692   | GENE_ID=r1;Pool=2                                                                                            | 223   | 387     | 79     | 31   | 2       | 7955    | 13796   | 249     | 51     | 5       | 0       | 0       | 3        | 21371  | 0       | 28     |
| 2019-nCoV | 28123 | 28336 r1_1.29.157415   | GENE_ID=r1;Pool=1                                                                                            | 213   | 140     | 225    | 190  | 0       | 45443   | 43515   | 2908    | 269    | 58      | 0       | 0       | 18       | 140146 | 0       | 79     |
| 2019-nCoV | 28240 | 28462 r1_1.29.212662   | GENE_ID=r1;Pool=2                                                                                            | 222   | 335     | 220    | 36   | 2       | 13660   | 19546   | 411     | 70     | 1       | 0       | 0       | 7        | 35983  | 0       | 23     |
| 2019-nCoV | 28374 | 28606 r1_1.29.497787   | GENE_ID=r1;Pool=1                                                                                            | 232   | 45      | 113    | 91   | 0       | 9449    | 11482   | 824     | 87     | 15      | 0       | 0       | 10       | 33314  | 0       | 17     |
| 2019-nCoV | 28513 | 28738 r1_1.29.970483   | GENE_ID=r1;Pool=2                                                                                            | 225   | 248     | 230    | 54   | 2       | 16756   | 33348   | 2419    | 369    | 38      | 0       | 0       | 21       | 74184  | 0       | 45     |
| 2019-nCoV | 28641 | 28859 r1_1.29.794786   | GENE_ID=r1;Pool=1                                                                                            | 218   | 203     | 203    | 164  | 11      | 37524   | 71896   | 34178   | 2194   | 329     | 0       | 0       | 37       | 167660 | 0       | 75     |
| 2019-nCoV | 28777 | 28997 r1_1.30.584838   | GENE_ID=r1;Pool=2                                                                                            | 220   | 202     | 188    | 25   | 0       | 15379   | 27839   | 1534    | 316    | 7       | 0       | 0       | 21       | 63100  | 0       | 46     |
| 2019-nCoV | 28902 | 28956 N                | GENE_ID=r1;Pool=1                                                                                            | 54    | 2256    | 906378 | 8384 | 234     | 5302    | 246544  | 162029  | 215868 | 49666   | 347820  | 345122  | 490868   | 142336 | 0       | 737889 |
| 2019-nCoV | 28995 | 29206 r1_1.30.329795   | GENE_ID=r1;Pool=1                                                                                            | 211   | 27      | 96     | 25   | 1       | 5993    | 5061    | 5       | 3      | 0       | 0       | 0       | 3        | 1740   | 0       | 7      |
| 2019-nCoV | 29040 | 29256 r1_1.30.616808   | GENE_ID=r1;Pool=2                                                                                            | 216   | 207     | 307    | 3    | 0       | 1086    | 1266    | 27      | 2      | 0       | 0       | 0       | 11       | 3791   | 0       | 31     |
| 2019-nCoV | 29236 | 29457 r1_1.30.789366   | GENE_ID=r1;Pool=1                                                                                            | 221   | 34      | 61     | 36   | 0       | 10007   | 18004   | 148     | 30     | 3       | 0       | 0       | 79       | 24810  | 0       | 26     |
| 2019-nCoV | 29307 | 29529 r1_1.30.455242   | GENE_ID=r1;Pool=2                                                                                            | 222   | 354     | 288    | 48   | 0       | 17060   | 51302   | 5       | 3      | 2       | 0       | 0       | 61       | 10489  | 0       | 389    |
| 2019-nCoV | 29498 | 29727 r1_1.30.1041188  | GENE_ID=r1;Pool=1                                                                                            | 229   | 109     | 192    | 74   | 2       | 9260    | 27754   | 478     | 69     | 24      | 0       | 0       | 91       | 71797  | 0       | 44     |
| 2019-nCoV | 29593 | 29786 r2_1.79363       | GENE_ID=r1;Pool=2                                                                                            | 193   | 232     | 342    | 57   | 14      | 20206   | 48987   | 19193   | 1855   | 85      | 9       | 19      | 232      | 74540  | 0       | 219    |
| 2019-nCoV | 29754 | 29842 r2_1.61925       | GENE_ID=r1;Pool=1                                                                                            | 88    | 1387    | 14525  | 3580 | 9       | 75670   | 108335  | 279027  | 194623 | 139936  | 160947  | 422685  | 1152411  | 177131 | 0       | 724501 |
| NM_000190 | 608   | HMBS.ENCTRL.E8E9_2     | GENE_ID=HMBS.ENTRL.E8E9;Pool=1 and 2                                                                         | 91    | 0       | 0      | 22   | 28      | 1       | 0       | 91585   | 66551  | 210787  | 35621   | 230305  | 85       | 476    | 70221   | 0      |
| NM_000889 | 2219  | ITGB7.ENCTRL.E14_E15_2 | TRLE14E15;Pool=1 and 2                                                                                       | 80    | 1       | 1      | 120  | 1725    | 3       | 2       | 214265  | 220593 | 242317  | 284859  | 580411  | 1055     | 732    | 16      | 0      |
| NM_002332 | 9618  | LRP1.ENCTRL.E57E5_8_2  | GENE_ID=LRP1.ENTRL.E57E58;Pool=1 and 2                                                                       | 108   | 1       | 0      | 2    | 66      | 18      | 9       | 81749   | 82467  | 260623  | 11510   | 167868  | 7        | 193    | 2944    | 0      |
| NM_002467 | 1302  | MYC.ENCTRL.E2E3_2      | GENE_ID=MYC.ENTRL.E2E3;Pool=1 and 2                                                                          | 86    | 0       | 1      | 12   | 626     | 2       | 0       | 163657  | 138145 | 159479  | 43798   | 96124   | 186      | 338    | 22633   | 0      |
| NM_003194 | 726   | 814 TBP.ENCTRL.E3E4_2  | GENE_ID=TBP.ENTRL.E3E4;Pool=1 and 2<br>amplicons<br>21500 nucleotides of virus<br>amplicons per 5 mill reads | 88    | 0       | 0      | 54   | 421     | 1       | 0       | 214567  | 222864 | 483313  | 259450  | 575261  | 5        | 1486   | 157551  | 2      |
|           |       |                        |                                                                                                              | 51260 | 962816  | 25671  | 1047 | 3933206 | 3054326 | 3542478 | 1205283 | 276770 | 522251  | 938485  | 2284567 | 12069632 | 0      | 2365057 |        |
|           |       |                        |                                                                                                              | 34576 | 29284   | 9947   | 591  | 2734938 | 1685536 | 1918858 | 403873  | 37304  | 12136   | 138938  | 607119  | 8161619  | 0      | 658901  |        |
|           |       |                        |                                                                                                              | 42717 | 4011733 | 80222  | 4027 | 3710572 | 4627767 | 6812458 | 2620180 | 532250 | 2008658 | 1564142 | 2239772 | 4220151  | 0      | 3032124 |        |

IonXpress\_033\_cov\_test4

|                                                                    |       |         |       |      |         |         |         |        |        |         |        |         |         |   |        |
|--------------------------------------------------------------------|-------|---------|-------|------|---------|---------|---------|--------|--------|---------|--------|---------|---------|---|--------|
| Sum of amplicons first 21500 nucleotides of virus per 5 mill reads | 28813 | 122017  | 31084 | 2273 | 2580130 | 2553842 | 3690112 | 877985 | 71738  | 46677   | 231563 | 595215  | 2853713 | 0 | 844745 |
| reads first 21500 nucleotides                                      | 206   | 174     | 59    | 4    | 16279   | 10033   | 11422   | 2404   | 222    | 72      | 827    | 3614    | 48581   | 0 | 3922   |
| Standard deviation on above value                                  | 167   | 258     | 86    | 4    | 13574   | 6451    | 30657   | 9510   | 1346   | 670     | 7008   | 32277   | 55988   | 0 | 30911  |
| reads first 21500 nucleotides per 5 mill reads                     | 172   | 726     | 185   | 14   | 15358   | 15201   | 21965   | 5226   | 427    | 278     | 1378   | 3543    | 16986   | 0 | 5028   |
| Standard deviation on above value                                  | 139   | 1077    | 270   | 17   | 12805   | 6086    | 58956   | 20673  | 2589   | 2576    | 11681  | 31644   | 19576   | 0 | 39629  |
| reads                                                              | 15    | 12      | 0     | 0    | 72      | 93      | 0       | 0      | 0      | 0       | 0      | 0       | 3       | 0 | 0      |
| Minimum amplicon reads - not zero                                  | 15    | 12      | 1     | 1    | 72      | 93      | 1       | 1      | 1      | 1       | 1      | 1       | 3       | 0 | 1      |
| Maximum amplicon reads, first 21500 nucleotides; per 5 mill reads  | 693   | 12617   | 3022  | 81   | 79092   | 55377   | 408398  | 181672 | 32142  | 28396   | 125907 | 351893  | 99927   | 0 | 417778 |
| Maximum amplicon reads, whole virus genome; per 5 mill reads       | 1880  | 3776575 | 26200 | 900  | 91491   | 373552  | 661887  | 469278 | 269108 | 1337769 | 704475 | 1129815 | 116186  | 0 | 946012 |

Supplementary Table S3. Table showing the number of reads at MAPQ 32 with partial leader sequence in each sample mapped to the 5' UTR, known subgenomic RNAs in SARS-CoV-2 and unknown/unrecognised TRS sequences.

| Sample   | Read Mapping Location |        |        |        |        |        |      |        |        |       |        |       |
|----------|-----------------------|--------|--------|--------|--------|--------|------|--------|--------|-------|--------|-------|
|          | Unknown TRS           | 5' UTR | S Gene | ORF 3a | E Gene | M Gene | ORF6 | ORF 7a | ORF 7b | ORF 8 | N Gene | ORF10 |
| GC-28/67 | 0                     | 0      | 0      | 0      | 0      | 0      | 0    | 0      | 0      | 0     | 0      | 0     |
| GC-26/66 | 4836                  | 136473 | 1915   | 12813  | 13078  | 5852   | 4397 | 18731  | 73     | 1238  | 14155  | 16    |
| GC-13/35 | 25                    | 75     | 1      | 12     | 13     | 10     | 11   | 55     | 0      | 58    | 56     | 0     |
| GC-11/34 | 439                   | 854    | 5      | 21     | 52     | 44     | 36   | 508    | 0      | 850   | 23     | 0     |
| GC-11/38 | 409                   | 11889  | 158    | 1707   | 962    | 1589   | 988  | 3843   | 7      | 527   | 3215   | 0     |
| GC-20/63 | 0                     | 57     | 0      | 0      | 75     | 2      | 564  | 0      | 0      | 0     | 0      | 0     |
| GC-24/61 | 1                     | 575    | 0      | 1      | 10205  | 292    | 1    | 4766   | 0      | 0     | 9694   | 0     |
| GC-12/36 | 1                     | 0      | 0      | 3      | 0      | 0      | 1    | 1      | 0      | 1     | 1      | 0     |
| GC-14/33 | 68                    | 455    | 15     | 44     | 35     | 89     | 40   | 222    | 0      | 149   | 148    | 0     |
| GC-14/37 | 2138                  | 14857  | 362    | 4431   | 3374   | 5085   | 4047 | 11493  | 37     | 2155  | 20117  | 0     |
| GC-23/60 | 408                   | 7155   | 268    | 73     | 31556  | 424    | 7576 | 8801   | 0      | 2764  | 4282   | 0     |
| GC-51/62 | 1                     | 310    | 0      | 0      | 0      | 90     | 0    | 19112  | 0      | 0     | 11353  | 0     |
| GC-21/64 | 10859                 | 3680   | 0      | 0      | 0      | 85     | 0    | 8725   | 0      | 2431  | 3092   | 0     |
| GC-25/65 | 25675                 | 29936  | 11     | 9      | 10882  | 1174   | 9756 | 150151 | 0      | 27303 | 1226   | 0     |
| GC-55/68 | 6345                  | 8934   | 15     | 13     | 20126  | 3975   | 2777 | 152619 | 0      | 9242  | 587    | 0     |

Supplementary Table S4. Table showing the number of reads containing the partial leader sequence when searched for in the following SARS-CoV-2 Short Read Archives (SRA)'s in NCBI's SRA database. The number of reads with partial leader sequence mapped from each SRA mapped to the 5' UTR, subgenomic RNAs and unknown/unrecognised TRS sequences are shown.

| SRA         | Sequencing Platform | Sample   | Library Creation | Unknown TRS | UTR  | S Gene | ORF 3a | E Gene | M Gene | ORF 6 | ORF 7a | ORF 7b | ORF 8 | N Gene | ORF 10 | Total Subgenomic reads | Total Reads with Leader |
|-------------|---------------------|----------|------------------|-------------|------|--------|--------|--------|--------|-------|--------|--------|-------|--------|--------|------------------------|-------------------------|
| ERR4157962  | Illumina            | Culture  | Amplicon         | 14          | 0    | 69     | 17     | 14     | 56     | 52    | 36     | 0      | 7     | 188    | 0      | 439                    | 453                     |
| ERR4157960  | Illumina            | Culture  | Amplicon         | 10          | 1451 | 82     | 10     | 4      | 47     | 89    | 10     | 0      | 0     | 285    | 0      | 527                    | 1988                    |
| SRR11267570 | Nanopore            | Culture  | RNA Seq          | 27          | 26   | 4      | 32     | 4      | 142    | 53    | 171    | 6      | 147   | 1395   | 0      | 1954                   | 2007                    |
| SRR11648002 | Nanopore            | Clinical | Amplicon         | 2           | 2817 | 0      | 0      | 7      | 0      | 1     | 0      | 0      | 0     | 1      | 0      | 9                      | 2828                    |
| SRR11648052 | Nanopore            | Clinical | Amplicon         | 15          | 2194 | 2      | 0      | 8      | 0      | 0     | 1      | 0      | 0     | 18     | 0      | 29                     | 2238                    |
| SRR11779980 | Illumina            | Culture  | RNA Seq          | 1           | 59   | 2      | 5      | 3      | 2      | 1     | 6      | 0      | 2     | 16     | 0      | 37                     | 97                      |
| SRR11779998 | Illumina            | Culture  | RNA Seq          | 1           | 901  | 9      | 29     | 5      | 4      | 14    | 21     | 0      | 8     | 50     | 0      | 140                    | 1042                    |
| SRR11810731 | Ion Torrent         | Clinical | Amplicon         | 1           | 1935 | 0      | 78     | 328    | 719    | 0     | 1120   | 0      | 0     | 169    | 0      | 2414                   | 4350                    |
| SRR11810737 | Ion Torrent         | Clinical | Amplicon         | 299         | 4692 | 313    | 1551   | 1075   | 1989   | 544   | 4138   | 37     | 402   | 4954   | 0      | 15003                  | 19994                   |
| SRR11528306 | Illumina            | Culture  | Amplicon         | 0           | 0    | 0      | 0      | 0      | 0      | 0     | 1      | 0      | 1     | 1      | 0      | 3                      | 3                       |
| SRR11454612 | Illumina            | Clinical | RNA Seq          | 0           | 0    | 0      | 0      | 0      | 0      | 0     | 0      | 0      | 0     | 0      | 0      | 0                      | 0                       |
| SRR11454615 | Illumina            | Clinical | RNA Seq          | 0           | 6    | 0      | 0      | 0      | 0      | 0     | 0      | 0      | 0     | 2      | 0      | 2                      | 8                       |
| SRR11454609 | Illumina            | Clinical | RNA Seq          | 0           | 73   | 0      | 4      | 0      | 0      | 3     | 0      | 0      | 1     | 2      | 0      | 10                     | 83                      |
| SRR11178050 | Nanopore            | Clinical | Random primer    | 0           | 0    | 0      | 0      | 0      | 0      | 0     | 1      | 0      | 0     | 0      | 0      | 1                      | 1                       |
| SRR10948474 | Nanopore            | Clinical | RNA Seq          | 22          | 137  | 5      | 19     | 1      | 11     | 2     | 19     | 0      | 4     | 16     | 0      | 77                     | 236                     |



**Supplementary Table S5. Table showing sample details with corresponding Ct value of strand specific PCR amplification using specific targets**

| Sample      | Sample collection date | cDNA FP2<br><br>Negative strand<br><br>7a<br>Genomic and Sub-genomic<br>(Set 2) (Ct) | cDNA RP1-3<br><br>Positive strand<br>7a<br>Genomic and sub-genomic<br>(Set 2) (Ct) | cDNA P1<br><br>Negative strand<br>Leader-7a<br>Subgenomic only<br>(Set 1) (Ct) | cDNA RP1-3<br><br>Positive strand<br>Leader-7a<br>Subgenomic only<br>(Set 1) (Ct) | cDNA FP2<br><br>Negative strand<br>7a<br>Genomic and sub-genomic<br>(Set 5) (Ct) | cDNA RP1-2<br><br>Positive strand<br>7a<br>Genomic and sub-genomic<br>(Set 5) (Ct) |
|-------------|------------------------|--------------------------------------------------------------------------------------|------------------------------------------------------------------------------------|--------------------------------------------------------------------------------|-----------------------------------------------------------------------------------|----------------------------------------------------------------------------------|------------------------------------------------------------------------------------|
| NTC         |                        | Neg                                                                                  | Neg                                                                                | Neg                                                                            | Neg                                                                               | Neg                                                                              | Neg                                                                                |
| GC-26/66    | 7/03/2020              | Neg                                                                                  | <b>23.4</b>                                                                        | Neg                                                                            | <b>28.6</b>                                                                       |                                                                                  |                                                                                    |
| GC-13/35    | 23/03/2020             | Neg                                                                                  | <b>28.8</b>                                                                        | Neg                                                                            | Neg                                                                               |                                                                                  |                                                                                    |
| GC-11/34/38 | 24/03/2020             | Neg                                                                                  | <b>19.7</b>                                                                        | Neg                                                                            | <b>24.8</b>                                                                       | Neg                                                                              | <b>20.1</b>                                                                        |
| GC-14/33/37 | 28/03/2020             | <b><u>29.6</u></b>                                                                   | <b>21</b>                                                                          | Neg                                                                            | <b>26.7</b>                                                                       | No Ct but correct Tm                                                             | <b>21.5</b>                                                                        |
| GC-23/60    | 8/04/2020              | Neg                                                                                  | Neg                                                                                | Neg                                                                            | <b>29.5</b>                                                                       |                                                                                  |                                                                                    |
| GC-25/65    | 10/04/2020             | <b><u>27.6</u></b>                                                                   | <b>19</b>                                                                          | <b>28.5</b>                                                                    | <b>23.5</b>                                                                       |                                                                                  |                                                                                    |
| GC-55/68    | 24/04/2020             | <b><u>28.6</u></b>                                                                   | <b>19.8</b>                                                                        | <b>30.5</b>                                                                    | <b>25.5</b>                                                                       |                                                                                  |                                                                                    |

**Note:** NTC, non-template control (water). Positive results are indicated in bold and underlined for negative strand positivity while negative strand positivity for the 7a subgenomic RNA is further indicated in red.

**Supplementary Table S6. Table showing volume adjusted PCR Ct values for fractions of samples GC-26/66 and GC-55/68, respectively, subjected to fractionation to look at membrane protection of SARS-CoV-2 RNAs (Non-Triton treated fractions only)**

| Fraction Treatment  |             |        |          |             | PCR Results |       |       |            |                   |               |
|---------------------|-------------|--------|----------|-------------|-------------|-------|-------|------------|-------------------|---------------|
| Sample Fraction     | 1000 x g    | Triton | Nuclease | 10,000 x g  | ORF1ab      | S     | N     | 7a (Set 2) | Leader-7a (Set 1) | 7a-plus sense |
| GC-26/66 PIP10T-N+  | Pellet      | No     | Yes      | Pellet      | 18.22       | 17.82 | 21.32 | 15.89      | 19.99             | 18.49         |
| GC-26/66 PIS10T-N+  | Pellet      | No     | Yes      | Supernatant | 22.09       | 21.94 | 25.19 | 20.82      | 24.42             | 23.02         |
| GC-26/66 PIP10T-N-  | Pellet      | No     | No       | Pellet      | 19.47       | 19.37 | 22.77 | 17.99      | 22.09             | 20.99         |
| GC-26/66 PIS10T-N-  | Pellet      | No     | No       | Supernatant | 21.89       | 21.79 | 25.09 | 21.12      | 25.32             | 22.42         |
| GC-26/66 SIP10T-N-  | Supernatant | No     | Yes      | Pellet      | 24.81       | 24.71 | 28.51 | 23.92      | 29.42             | Neg           |
| GC-26/66 SIS10T-N+  | Supernatant | No     | Yes      | Supernatant | 27.88       | 27.18 | 31.33 | 26.56      | Neg               | Neg           |
| GC-26/66 SIP10T-N-  | Supernatant | No     | No       | Pellet      | 20.71       | 20.31 | 23.71 | 19.72      | 23.72             | 21.72         |
| GC-26/66 SIS10T-N-  | Supernatant | No     | No       | Supernatant | 22.33       | 22.03 | 25.33 | 21.86      | 25.26             | 23.16         |
| GC-55/68 PIP10T-N+  | Pellet      | No     | Yes      | Pellet      | 30.12       | 24.02 | 28.52 | 25.59      | 27.69             | Neg           |
| GC-55/68 PIS10T-N+  | Pellet      | No     | Yes      | Supernatant | 31.14       | 31.99 | 29.94 | 25.32      | 30.02             | Neg           |
| GC-55/68 PIP10T-N-  | Pellet      | No     | No       | Pellet      | 17.77       | 17.27 | 21.87 | 15.79      | 20.29             | 18.89         |
| GC-55/68 PIS10 T-N- | Pellet      | No     | No       | Supernatant | 20.14       | 19.84 | 23.94 | 18.42      | 21.92             | 20.82         |
| GC-55/68 SIP10T-N+  | Supernatant | No     | Yes      | Pellet      | 17.61       | 17.36 | 21.51 | 11.42      | 22.42             | 14.42         |
| GC-55/68 SIS10T-N+  | Supernatant | No     | Yes      | Supernatant | 17.78       | 17.48 | 21.63 | 14.96      | 20.96             | 21.86         |
| GC-55/68 SIP10T-N-  | Supernatant | No     | No       | Pellet      | 16.26       | 16.46 | 19.91 | 13.02      | 18.82             | 16.62         |
| GC-55/68 SIS10T-N-  | Supernatant | No     | No       | Supernatant | 16.23       | 16.28 | 20.23 | 12.76      | 17.56             | 16.46         |

Supplementary Figure S1. Box-and-whiskers plot showing the number of reads per total of 5 million reads at MAPQ 32 with the partial leader sequence which mapped to the start of a known subgenomic RNA in each sample. The median is shown as a line, the box is the 25-75th percentiles and the whiskers are 2.0xIQR (Interquartile Range). Values outside this (outliers) are shown as dark circles.

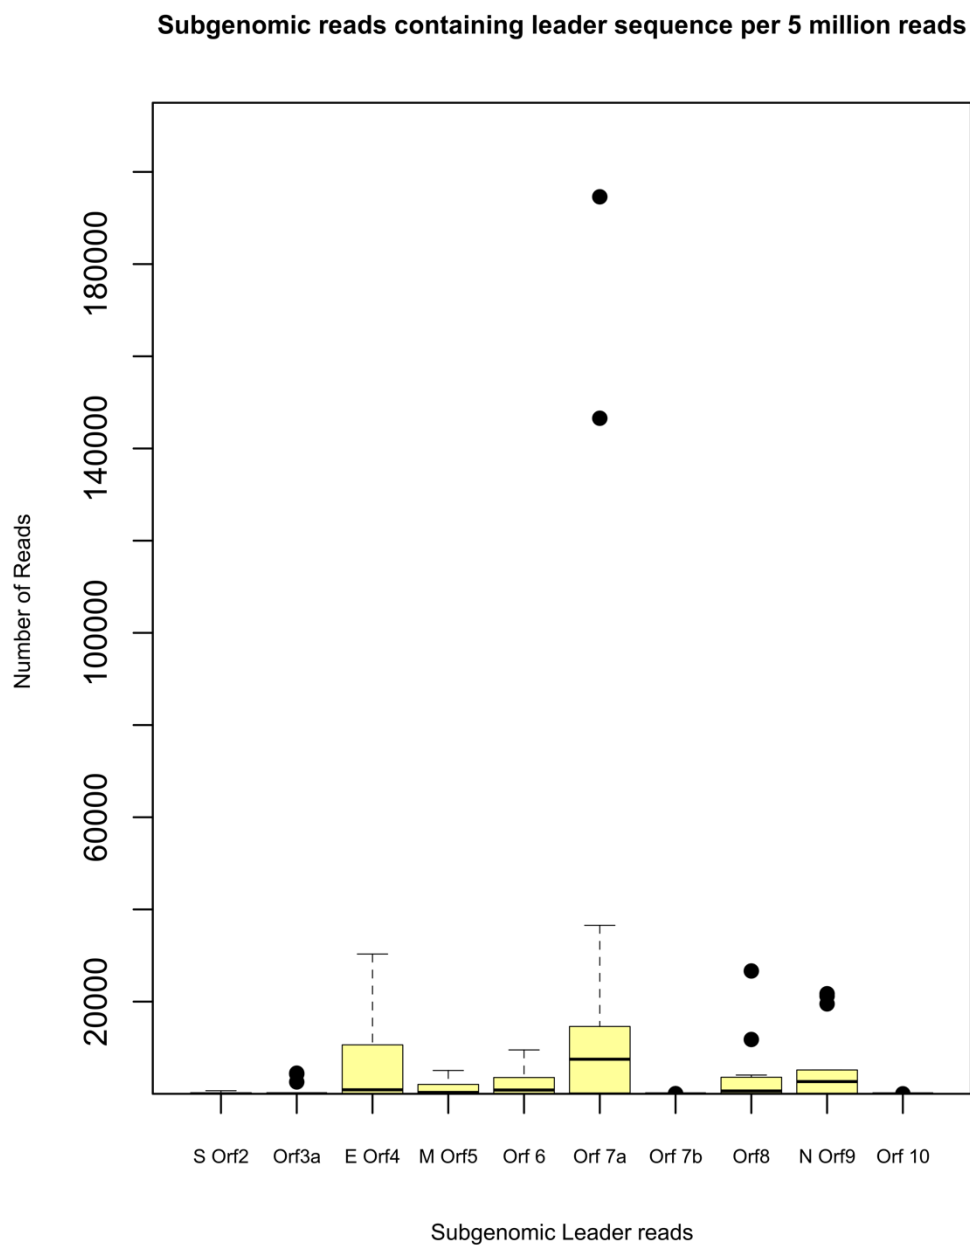

Supplement: Supplementary file [file 2020.06.01.20119750-1.pdf]
